1 **Dorsal horn CGRP-expressing interneurons contribute to nerve injury-induced**  
2 **mechanical hypersensitivity**

3

4 Löken LS<sup>1\*</sup>, Etlin A<sup>1</sup>, Bernstein M<sup>1</sup>, Steyert M<sup>1</sup>, Kuhn J<sup>1</sup>, Hamel K<sup>1</sup>, Llewellyn-Smith I<sup>2,3</sup>,  
5 Braz JM<sup>1</sup>, Basbaum AI<sup>1\*</sup>.

6

7 <sup>1</sup>Department Anatomy, University California, San Francisco, San Francisco, CA 94158,  
8 USA.

9 <sup>2</sup>Cardiovascular Medicine and Human Physiology, College of Medicine and Public  
10 Health, Flinders University, Bedford Park, South Australia, Australia.

11 <sup>3</sup>Discipline of Physiology, Adelaide Medical School, University of Adelaide, Adelaide,  
12 South Australia, Australia.

13

14 \*Corresponding authors: [line.loken@gu.se](mailto:line.loken@gu.se) or [allan.basbaum@ucsf.edu](mailto:allan.basbaum@ucsf.edu)

15

16

17 Abstract:

18 Primary sensory neurons are generally considered the only source of dorsal horn  
19 calcitonin gene-related peptide (CGRP), a neuropeptide critical to the transmission of  
20 pain messages. Using a tamoxifen-inducible CGRP<sup>CreER</sup> transgenic mouse, here we  
21 identified a distinct population of CGRP-expressing excitatory interneurons in lamina III  
22 of the spinal cord dorsal horn and trigeminal nucleus caudalis. These interneurons have  
23 spine-laden, dorsally-directed, dendrites and ventrally-directed axons. Neither  
24 innocuous nor noxious stimulation provoked significant Fos expression in these  
25 neurons. However, synchronous, electrical non-nociceptive A $\beta$  primary afferent  
26 stimulation of dorsal roots depolarized the CGRP interneurons, consistent with their  
27 receipt of a VGLUT1 innervation. In contrast, chemogenetic activation produced a  
28 significant mechanical hypersensitivity. Importantly, the CGRP interneurons could be  
29 activated after peripheral nerve injury, but only with concurrent innocuous, brush  
30 stimulation. These findings suggest that hyperexcitability of dorsal horn CGRP  
31 interneurons is an important contributor to the circuits that render touch painful after  
32 peripheral nerve damage.

## 33 INTRODUCTION

34 Calcitonin Gene Related Peptide (CGRP) is the most prominent molecular marker of  
35 the peptidergic subpopulation of primary afferent nociceptors (Basbaum, Bautista,  
36 Scherrer, & Julius, 2009). When released from peripheral terminals of sensory neurons,  
37 CGRP acts on endothelial cells that line blood vessels, producing pronounced  
38 vasodilation (Brain, Williams, Tippins, Morris, & MacIntyre, 1985). Recent efforts to  
39 develop novel therapeutics in the management of migraine led to the successful  
40 development of antibodies that scavenge CGRP, reducing the vasodilation that triggers  
41 migraine (Ho, Edvinsson, & Goadsby, 2010). When released into the superficial dorsal  
42 horn from the central branches of sensory neurons, CGRP, along with its co-occurring  
43 neuropeptide, substance P, potentiates the glutamatergic excitation of postsynaptic  
44 neurons, contributing to injury-provoked central sensitization (Ryu, Gerber, Murase, &  
45 Randic, 1988; Woolf & Wiesenfeld-Hallin, 1986). The latter process, in turn, contributes  
46 to the ongoing pain and profound hypersensitivity characteristic of both inflammatory  
47 and neuropathic pains. Interestingly, a recent study showed that pharmacological  
48 inhibition of CGRP receptor signaling in the periphery alleviates incision-induced  
49 mechanical and heat hypersensitivity, but not neuropathic pain, suggesting that primary  
50 sensory neuron-derived CGRP differentially influences injury-induced persistent pain  
51 (Cowie, Moehring, O'Hara, & Stucky, 2018).

52  
53 Despite a much earlier study in which colchicine was used to enhance somatic CGRP  
54 levels (Kruger, Sternini, Brecha, & Mantyh, 1988; Tie-Jun, Xu, & Hokfelt, 2001) and a  
55 more recent report (McCoy, Taylor-Blake, & Zylka, 2012) of small CGRP-positive cells  
56 in the dorsal horn of a reporter mouse, the prevailing view is that dorsal horn CGRP  
57 derives exclusively from afferents. Here we took advantage of a tamoxifen-inducible  
58 CGRP<sup>CreER</sup> mouse line, which when crossed with a tdTomato reporter mouse, reveals a  
59 discrete population of CGRP-expressing interneurons that are concentrated in lamina  
60 III and inner lamina II of the spinal cord dorsal horn and trigeminal nucleus caudalis.

61 Unlike dorsal horn vertical cells, which have ventrally-directed dendrites and a dorsally-  
62 directed axon, the CGRP interneurons have mainly dorsally-directed dendrites and  
63 ventrally-directed axons. A comprehensive functional analysis showed that these  
64 interneurons are minimally responsive to a host of acute, innocuous or noxious  
65 mechanical and chemical stimuli, despite the fact that electrical stimulation of A $\beta$   
66 afferents readily activates the cells. On the other hand, an innocuous mechanical  
67 stimulus evoked significant Fos expression in the setting of peripheral nerve injury and  
68 chemogenetic activation of the interneurons produced significant mechanical  
69 hypersensitivity. We conclude that these CGRP-expressing interneurons engage deep  
70 dorsal horn nociresponsive circuits that contribute to nerve injury-induced central  
71 sensitization and A $\beta$ -mediated mechanical allodynia.

72

## 73 **RESULTS**

74 To map the distribution of CGRP-expressing neurons in the dorsal horn, we first  
75 crossed the CGRP<sup>CreER</sup> mouse line with a floxed stop ROSA-tdTomato line. Adult mice  
76 were administered tamoxifen twice (150 mg/kg, at postnatal days 21-23), and as  
77 reported previously, this triggered tdTomato expression in primary sensory neurons  
78 (Patil, Hovhannisyan, & Akopian, 2018). However, we also recorded significant labeling  
79 of neurons in the dorsal horn and trigeminal nucleus caudalis (N. Caudalis; Figure 1).  
80 Importantly, because the tamoxifen is administered at 3-4 weeks of age, we conclude  
81 that the pattern of expression is reflective of that found in the adult.

82

83 We first confirmed the approach by ensuring that the tdTomato-expressing primary  
84 sensory neurons of the dorsal root ganglia (DRG) double-label with an antibody to  
85 CGRP. Figure 1 illustrates that 80% of tdTomato-positive neurons in trigeminal ganglia  
86 (TG) and DRG immunostained for CGRP and that 78% of the CGRP immunoreactive  
87 neurons were tdTomato-positive (Figs. 1a-d).

88 **Figure 1. Validating the CGRP<sup>Cre-ER</sup> transgenic mouse.**

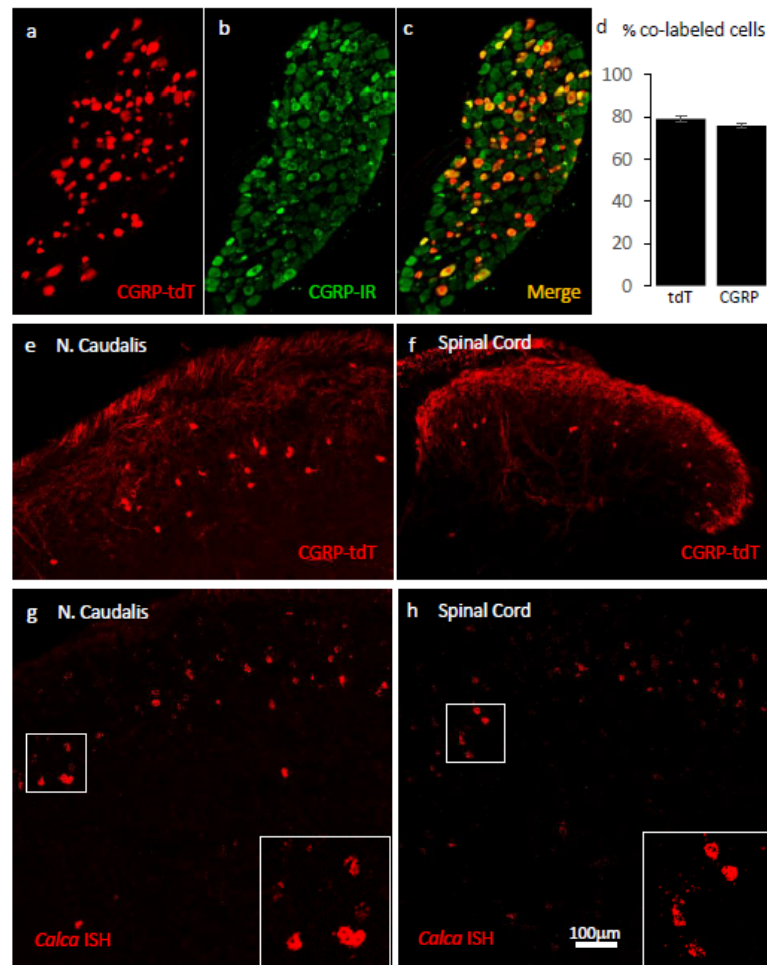

89 **Figure 1. a-c)** Example of genetically labelled CGRP neurons from dorsal root ganglion of  
90 double transgenic CGRP<sup>CreER</sup> / tdTomato mice generated by crossing the CGRP<sup>CreER</sup> mouse line  
91 with a floxed stop ROSA-tdTomato line. Adult CGRP<sup>CreER</sup> / tdTomato mice received 2 injections  
92 of tamoxifen (150 mg/kg). Co-localization of tdTomato-(red) with CGRP- immunoreactivity  
93 (green) confirmed the specificity of CGRP<sup>CreER</sup> expression in trigeminal and dorsal root ganglia.  
94 **d)** 80% of tdTomato-positive neurons were immunoreactive for CGRP (left bar) and 78% of  
95 CGRP-positive neurons were tdTomato-immunoreactive (right bar). Bars show mean and  
96 standard error (SEM) (3 mice, 4 sections each). **e-f)** TdTomato expression was also detected in  
97 neurons of nucleus caudalis (**e**) and the spinal cord dorsal horn (**f**). The tdTomato-  
98 immunoreactive neurons were concentrated in lamina III and occasionally observed in more  
99 superficial layers. **g-h)** *In situ* hybridization confirmed expression of CGRP mRNA in the dorsal  
100 horn (**g**) and nucleus caudalis (**h**). Insets show higher magnification of the CGRP mRNA  
101 expressing neurons. Scale bars: 100 μm.

102 Consistent with the central projection of CGRP-expressing sensory neurons, we also  
103 observed very dense tdTomato-positive terminals in the superficial laminae of the  
104 dorsal horn and nucleus caudalis. We also recorded many tdTomato-labeled neurons in  
105 regions of the central nervous system known to contain significant populations of  
106 CGRP-immunoreactive neurons or terminals, including motoneurons in the ventral horn  
107 of the spinal cord (Supplementary Figure 1), the parabrachial nucleus (Supplementary  
108 Figure 2), subparafascicularis of the thalamus (Supplementary Figure 3) (Yasui, Saper,  
109 & Cechetto, 1991), and central nucleus of the amygdala (Supplementary Figure 3) and  
110 in cranial motor nuclei (Supplementary Figure 4). We conclude that the pattern of  
111 CGRP-expression observed in the CGRP<sup>CreER</sup> mouse provides a reliable marker of  
112 CGRP-expressing neurons in the adult.

113

114 Unexpectedly, we also found large numbers of small tdTomato-positive neurons in the  
115 superficial dorsal horn and nucleus caudalis (notably in lamina III) and occasionally in  
116 more superficial layers (Figures 1e-f: Supplementary Figure 8c). Consistent with  
117 previous literature, we did not detect CGRP-immunoreactivity in dorsal horn neurons  
118 using well-validated antibodies. However, by *in situ* hybridization we confirmed that  
119 CGRP mRNA is present in neurons in the same regions of the spinal cord dorsal horn  
120 and nucleus caudalis (Figure 1g-h), which is consistent with the single cell PCR reports  
121 of CGRP message in subpopulations of dorsal horn neurons (Haring et al., 2018;  
122 Sathyamurthy et al., 2018). We speculate that the lack of CGRP immunostaining  
123 reflects rapid transport of the peptide from the cell body to its axon, which undoubtedly  
124 underlies the requirement for colchicine to demonstrate these neurons by  
125 immunocytochemistry (Kruger et al., 1988; Tie-Jun et al., 2001). We found the CGRP  
126 positive interneurons to be particularly abundant at the most caudal levels of the  
127 nucleus caudalis, markedly decreasing rostrally as the hypoglossal nucleus appears  
128 (Supplementary Figure 4).

129

130 **CGRP dorsal horn neurons are excitatory interneurons**

131 We next asked whether these CGRP-expressing neurons include both projection and  
132 interneurons. First, we injected the retrograde tracer Fluorogold (1%) into several brain  
133 areas that receive projections from the spinal cord dorsal horn. Despite an extensive  
134 analysis, which included injections into the ventrobasal and nucleus submedius  
135 (Yoshida, Dostrovsky, Sessle, & Chiang, 1991) of the thalamus, lateral parabrachial  
136 nucleus, and dorsal column nuclei, which are targeted by postsynaptic dorsal column  
137 neurons located in the region of lamina IV of the dorsal horn, we found no evidence of  
138 CGRP-expressing projection neurons. This finding was confirmed with an anterograde  
139 tracing approach in which we injected an AAV1-flex-GCaMP6s virus unilaterally into the  
140 nucleus caudalis of CGRP<sup>CreER</sup>/tdT mice (Supplementary Figure 7). After 4 weeks, we  
141 examined the brainstem, thalamus and hypothalamus for GFP-labeled fibers, but found  
142 no evidence of long distance axonal projections deriving from the lamina III CGRP  
143 cells.

144

145 By immunolabeling the CGRP-tdTomato neurons, we next determined that these cells  
146 are excitatory and define a unique subset of interneurons. First, the CGRP-tdTomato  
147 cells co-express Lmx1b (98%; 92/94 tdT cells), but not Pax2 (Supplementary Figure 5),  
148 which are excitatory and inhibitory markers, respectively. Some of the CGRP-tdTomato  
149 cells populate inner lamina II, and here approximately 16% co-expressed PKC $\gamma$  (31/187  
150 tdT cells), a marker of a large population of excitatory interneurons (Malmberg, Chen,  
151 Tonegawa, & Basbaum, 1997). Sixty-three (97/158 tdT cells) and 9% (9/97 tdT cells) of  
152 the CGRP interneurons co-expressed calbindin and calretinin, respectively, calcium  
153 binding proteins that mark subpopulations of excitatory dorsal horn interneurons (Figure  
154 2). The incomplete immunohistochemical overlap with major neurochemical classes of  
155 dorsal horn interneurons indicates that the CGRP interneurons are heterogeneous  
156 consistent with previously described populations of dorsal horn neurons. However, as

157 there is a limited number of quality antibodies that can be used for comprehensive  
158 neurochemical profiling we turned to *in situ* hybridization (Figure 3).

159 **Figure 2. CGRP-expressing neurons in the dorsal horn (a-f) and nucleus caudalis**  
160 **(g-l) are a distinct class of excitatory (Lmx1b+) interneurons.**

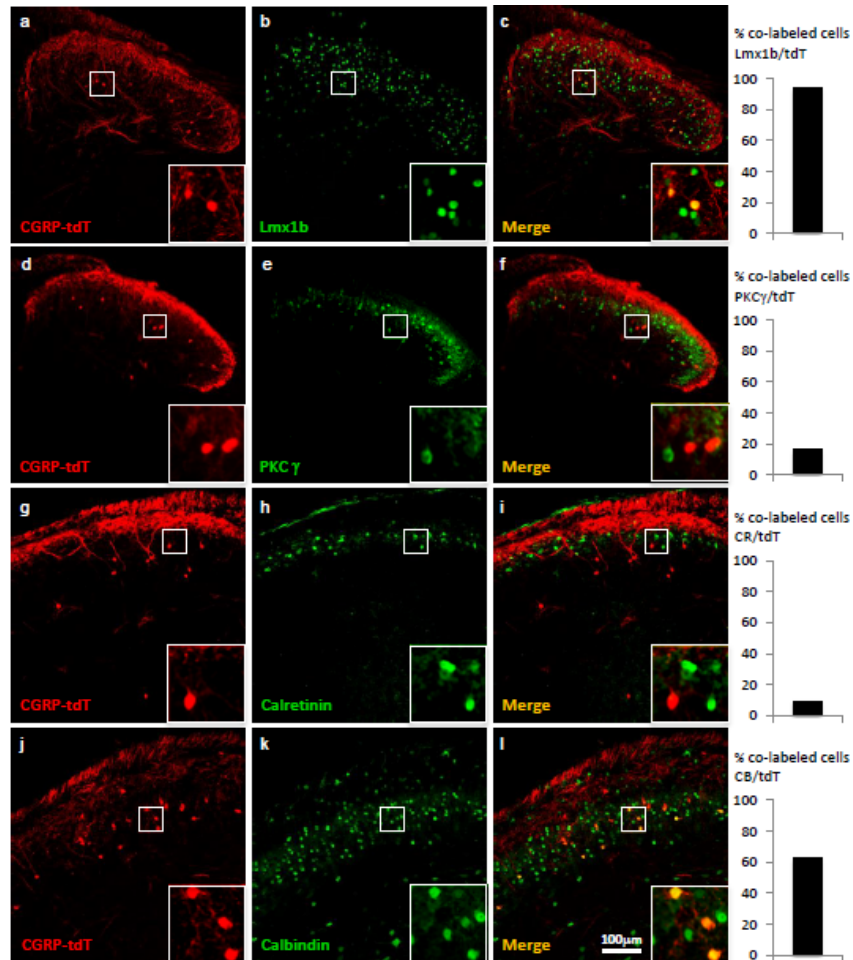

161 **Figure 2. a-l)** Immunohistochemistry showed that CGRP-tdTomato fluorescent neurons (red)  
162 co-express many markers (green) of excitatory, but not inhibitory (e.g., Pax2, Supplementary  
163 Figure 5) interneurons in the dorsal horn (a-f) and nucleus caudalis (g-l). Ninety-eight percent of  
164 CGRP-tdTomato neurons co-expressed Lmx1b (a-c), 16% co-expressed PKCγ (d-f), 9% co-  
165 expressed calretinin (g-i), and 63% co-expressed calbindin (j-l). Insets show higher  
166 magnification views of boxed areas in respective images. Graphs illustrate mean percentages ±  
167 SEM of CGRP-tdTomato neurons that were double-labelled with the indicated antibody (~100  
168 cells per antibody). Scale bar: 100 μm.

169



170 **Figure 3. Coexpression of CGRP mRNA with ROR $\alpha$  mRNA, but with neither CCK**  
171 **nor NK1R mRNA**

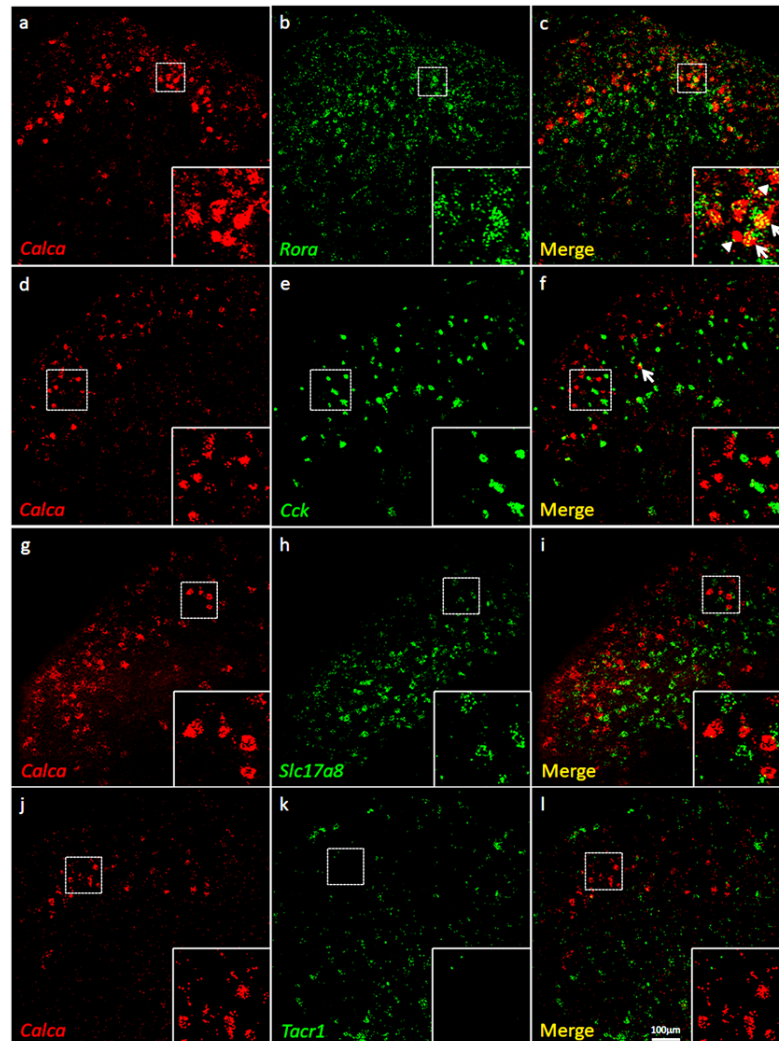

172 **Figure 3. a-l)** Co-expression of CGRP mRNA (*Calca*; red), with other markers (green) in  
173 subsets of dorsal horn (**a-c**; **j-l**) and nucleus caudalis (**d-i**) neurons. Of *Calca*-expressing cells,  
174 56% express ROR $\alpha$  mRNA (**a-c**), but only 4.4% express *Cck* mRNA (**d-f**). Similarly, there was  
175 minimal overlap of *Calca* and *Slc17a8*, the gene coding for VGLUT3 (**g-i**), or *Calca* and *Tacr1*,  
176 the gene coding for the NK1 receptor (**j-l**). Insets show higher magnification images of boxed  
177 areas. Scale bar: 100  $\mu$ m.

178

179 Consistent with the concentration of tdTomato-CGRP interneurons in lamina III,  
180 particularly notable is that 56% of the CGRP mRNA-expressing (*calca*) cells double-  
181 labeled for ROR $\alpha$  message (639/1134 CGRP mRNA-expressing cells), a marker of



182 excitatory interneurons in lamina III (Bourane, Grossmann, et al., 2015). Interestingly,  
183 however, only 4% co-expressed CCK (27/595 CGRP mRNA-expressing cells), which  
184 marks a significant subset of the ROR $\alpha$  population (Liu et al., 2018). As for other  
185 populations of excitatory interneurons, we found minimal overlap with the population  
186 that transiently expresses VGLUT3 (examined at P7) (Peirs et al., 2015) or others that  
187 express Nptx2, BDNF or the NK1 receptor, a marker of many projection neurons. We  
188 conclude that a substantial portion of the CGRP interneuron population overlaps with a  
189 subset of the CCK-negative ROR $\alpha$  population of lamina III interneurons.

190

191 **CGRP interneurons have dorsally-directed dendritic arbors and are innervated by**  
192 **VGLUT1-expressing terminals**

193 Despite the very intense tdTomato labeling of the cell bodies of the dorsal horn  
194 neurons, it was difficult to distinguish axonal processes from the dense primary sensory  
195 neuron-derived CGRP innervation. This was particularly the case when an antibody to  
196 tdTomato was used to detect the dorsal horn CGRP neurons. And unfortunately,  
197 although the cell body of the intracellularly recorded cells was readily filled with biotin  
198 dextran in electrophysiological slice preparations (see below), we never successfully  
199 filled dendrites or axons. Therefore, in a separate set of experiments we first reduced  
200 the complement of primary afferent-derived CGRP-derived by making an intrathecal  
201 injection of capsaicin, 7 days prior to perfusing the mice (Cavanaugh et al., 2009). In  
202 addition, tdTomato-immunoreactivity was revealed with immunoperoxidase staining so  
203 that sections could be analyzed by either light or electron microscopy (EM). The results  
204 from this approach were both striking and especially informative. Figure 4 illustrates  
205 that the CGRP interneurons have many dorsally-directed, spine-laden dendrites. These  
206 dendritic arbors often penetrated lamina II, and some labeled processes appeared to  
207 reach lamina I. Nevertheless, despite the capsaicin treatment, the latter were rare and  
208 difficult to distinguish from residual primary afferent-derived CGRP.

209

210 Based on their remarkably uniform dendritic morphology, the dorsal horn CGRP  
211 neurons appear to represent a subpopulation of excitatory, so-called radial interneurons  
212 (Grudt & Perl, 2002), however, the morphology of the CGRP-expressing radial  
213 interneurons differ considerably from those previously described in lamina II. First, the  
214 majority of lamina II radial cells have dendrites that arborize ventrally and axons that, if  
215 anything, project and collateralize dorsally, occasionally targeting presumptive  
216 projection neurons in lamina I. In contrast, not only do the CGRP interneurons have  
217 dorsally-directed dendrites, but almost all of their axons project ventrally and/or  
218 ventrocaudally. In some instances we could trace the axons well into the neck of the  
219 dorsal horn, including lamina V (Figure 5 and Supplementary Figure 6). Furthermore,  
220 EM analysis of these interneurons (Figure 5) illustrates that there is significant synaptic  
221 input to the soma, dendrites and spines of the CGRP interneurons. Finally, given the  
222 concentration of the CGRP interneurons in lamina III, we assumed that they receive  
223 primary afferent input from large myelinated afferents. Indeed when we double-  
224 immunostained for tdTomato and VGLUT1, a glutamate transporter that is highly  
225 expressed in large myelinated afferents (Oliveira et al., 2003), we observed many close  
226 appositions of VGLUT1-immunoreactive axon terminals onto the cell bodies and  
227 dendrites of the CGRP interneurons (Figure 4 f-j).

228

229 **Figure 4. Morphology and VGLUT1 innervation of dorsal horn CGRP**  
230 **interneurons.**

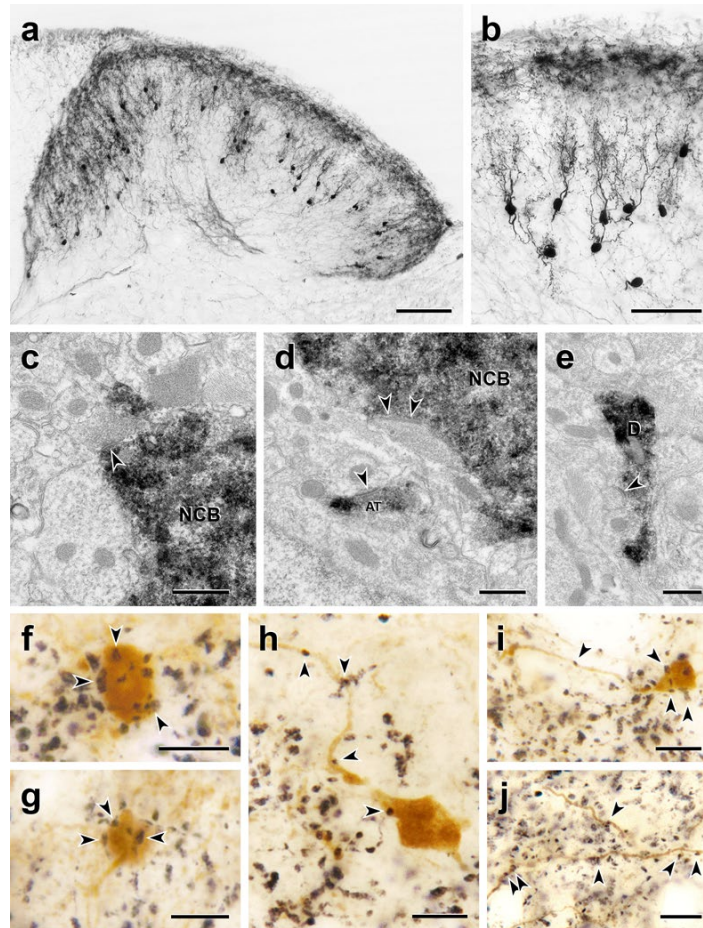

231

232 **Figure 4. a, b)** Most tdT-immunoreactive CGRP interneurons (black) are located in lamina III  
233 and have a relatively uniform morphology with many spiny, dorsally-projecting dendrites. Scale  
234 bars: 100  $\mu$ m in a; 50  $\mu$ m in b. **c-e):** Electron microscopic analysis revealed unlabelled host  
235 synapses (arrowheads) presynaptic to the cell bodies (NCB in c and d) and dendrites (D in e) of  
236 tdT-immunoreactive (black) CGRP interneurons. d also shows an asymmetric presynaptic input  
237 (AT) from a presumptive CGRP interneuron to an unlabelled host dendrite. **f - j),** Black VGLUT1-  
238 immunoreactive varicosities form close appositions (arrowheads) with the cell bodies (f & g) and  
239 dendrites (h - j) of brown tdT-immunoreactive CGRP interneurons. Scale bars: 500 nm in c - e,  
240 10  $\mu$ m in f - j.

241

242 **Figure 5. Trajectories of axons of CGRP-tdTomato interneurons.**

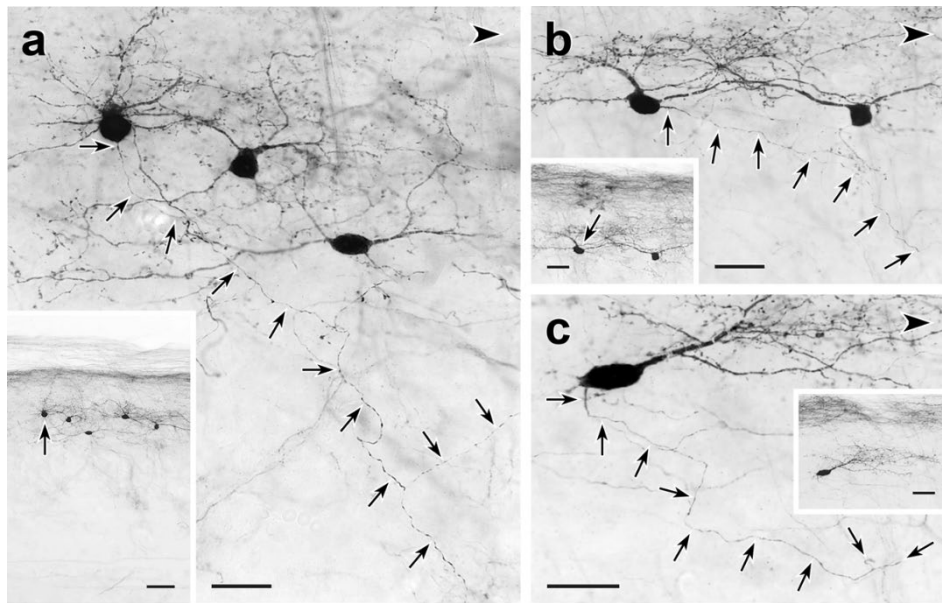

243

244 **Figure 5.** tdT-immunoreactive CGRP interneurons (black) in 50  $\mu\text{m}$  parasagittal sections from  
245 the lumbar dorsal horn of CGRP-tdTomato mice in which an intrathecal injection of capsaicin  
246 reduced primary afferent-derived CGRP. The CGRP-tdTomato neurons have spiny, dorsally-  
247 directed dendrites and their axons (arrows) course ventrally and often caudally (large  
248 arrowhead). Arrows in insets indicate location of the neurons whose axons are shown in **a**, **b**  
249 and **c**. Scale bars: 20  $\mu\text{m}$  in **a-c**, 50  $\mu\text{m}$  in inset **a**, 20  $\mu\text{m}$  in insets **b** and **c**.

250

251 **CGRP-tdTomato interneurons receive low threshold primary afferent input**

252 To confirm that the VGLUT1 appositions indeed mark a monosynaptic input from A $\beta$   
253 afferents to the CGRP-tdTomato interneurons, we prepared transverse lumbar and  
254 caudal medullary slices (350-400  $\mu\text{m}$ ) from 3-week old mice for whole-cell patch-clamp  
255 recordings. The slices contained large numbers of fluorescent tdTomato-labeled CGRP  
256 neurons (Figure 6a-c). We first characterized the intrinsic properties of the CGRP-  
257 tdTomato neurons by inducing depolarizing current steps. The CGRP-tdTomato  
258 neurons in the dorsal horn and nucleus caudalis showed mostly delayed firing patterns,  
259 consistent with their excitatory and radial phenotype (delayed 19, tonic 1, reluctant 2,  
260 single 2, no response 3, Supplementary Table 1). In some preparations we stimulated

261 an attached dorsal root. At near threshold stimulation intensities (10 Hz), we recorded a  
262 very short latency component, which likely corresponds to a monosynaptic A $\beta$ -fiber  
263 input. With more intense stimulation, we recorded a late component, with variable  
264 latency and failures. We assume that the latter derived from polysynaptic C-fiber input  
265 (Figure 6d-e). Of 5 cells recorded in 3 mice, all 5 received monosynaptic A $\beta$  input and 2  
266 of the 5 received polysynaptic C fiber input. In 2 additional mice we recorded from 4  
267 cells that responded to dorsal root stimulation at A and/or C fiber threshold, but we  
268 could not unequivocally establish whether they received a monosynaptic input. Overall,  
269 the intrinsic properties of neurons recorded from lumbar dorsal horn (22 cells, 8 mice)  
270 and nucleus caudalis (5 cells, 2 mice) were comparable (see Supplementary Table 1).  
271 Taken together, we conclude that the predominant input to the CGRP interneurons  
272 derives from low threshold (A $\beta$ ) mechanoreceptors.

273

274 **Figure 6. CGRP-tdTomato interneurons receive low threshold sensory inputs.**

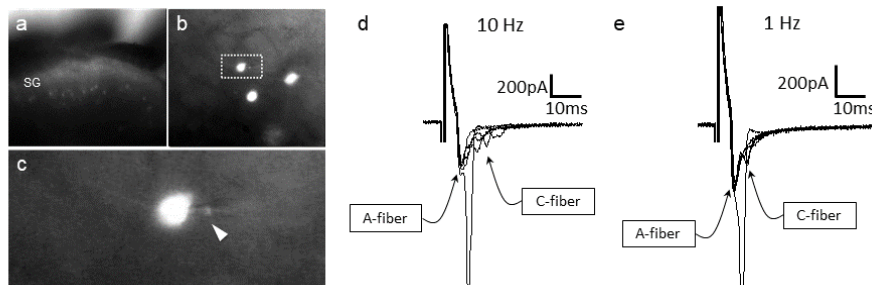

275 **Figure 6.** Low (a) and high (b) magnification micrographs of endogenous fluorescent CGRP-  
276 tdTomato neurons in a spinal cord slice. The boxed neuron in **b** is shown at high magnification  
277 in **c**; arrowhead points to the recording pipette in a whole cell configuration. **d,e**) Responses of  
278 CGRP-tdTomato interneuron to dorsal root stimulation at 10 Hz (**d**) or 1 Hz (**e**). An early,  
279 persistent component likely corresponds to a monosynaptic A-fiber input. The late component,  
280 with variable latency and failures, likely reflects polysynaptic C-fiber input.

281

282

283



284 **Mechanical stimuli engage CGRP neurons, but only in a nerve injury setting**

285 To provide a global activity measure of the stimuli that engage the CGRP interneurons,  
286 we first monitored Fos expression using a battery of noxious and innocuous stimuli. As  
287 expected, a unilateral injection of dilute formalin into the cheek (10  $\mu$ l of 2% formalin,  
288 Supplementary Figure 8c) or a unilateral hindpaw injection of capsaicin (Supplementary  
289 Figure 9a-b), produced considerable Fos immunolabeling of dorsal horn neurons, but  
290 not of the CGRP-tdTomato interneurons (Supplementary Figures 8c and 9a-b).  
291 Unexpectedly, however, selectively engaging non-nociceptive afferents by having the  
292 animal walk for 90 minutes on a rotarod, which provokes considerable Fos in laminae  
293 III and IV (Neumann, Braz, Skinner, Llewellyn-Smith, & Basbaum, 2008), did not induce  
294 Fos expression in the CGRP interneurons (Supplementary Figure 8a). The same was  
295 true for brushing of the cheek, another innocuous stimulus that activates A $\beta$  afferents  
296 (Figure 7). Finally, although CGRP is strongly implicated in the generation of migraine,  
297 largely but not exclusively via its peripheral vasodilatory action (Brain et al., 1985),  
298 systemic injection of nitroglycerin, which triggers migraine in humans and profound  
299 mechanical hypersensitivity in animals (Bates et al., 2010), did not induce Fos in the  
300 CGRP interneurons (Supplementary Figure 8b).

301 We conclude that despite our electrophysiological evidence that A $\beta$  afferents engage  
302 the CGRP interneurons, there does not appear to be sufficient input to activate these  
303 cells under natural innocuous mechanical stimulus conditions in uninjured mice (5.3%,  
304 5/88 tdT cells; Figure 7a). We, therefore, next asked whether an injury state would  
305 render the CGRP interneurons more responsive to an innocuous stimulus. In fact six  
306 days after inducing the spared nerve injury (SNI) model of neuropathic pain, we found  
307 that brushing the ipsilateral paw evoked Fos expression in 50% (53/110 tdT cells) of the  
308 dorsal horn CGRP interneurons (Figure 7c and d). Importantly, although we recorded  
309 significant dorsal horn Fos expression in nerve-injured mice without brushing (Figure  
310 7b), no Fos expression occurred in the CGRP interneurons (3%; 6/205 tdT cells). We



311 conclude that activation of the CGRP interneurons only occurs when the innocuous  
312 input engages the interneurons in the setting of nerve injury.

313

314 **Figure 7. Peripheral innocuous stimuli activate CGRP interneurons but only after**  
315 **spared nerve injury (SNI).**

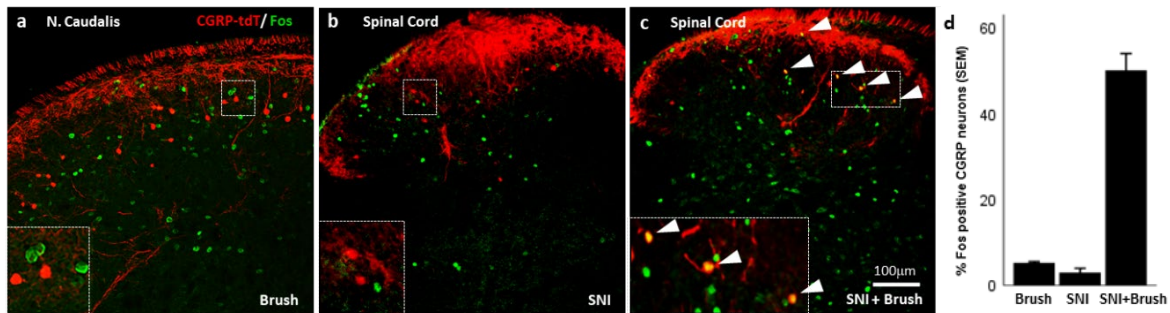

316 **Figure 7.** Fos-immunoreactive neurons in nucleus caudalis after brushing the cheek of a naïve  
317 uninjured mouse. **b)** Fos expression in the lumbar dorsal horn 6 day after SNI without additional  
318 peripheral stimulation. **c)** Fos expression in the lumbar dorsal horn 6-day after SNI with  
319 additional brush stimulation of the hindpaw. Insets: high magnification images of the boxed  
320 areas in the respective micrographs. Arrowheads indicate double-labeled cells. Scale bar: 100  
321  $\mu$ m. **d)** Mean percentages  $\pm$  SEM of CGRP-tdTomato neurons that are Fos-immunoreactive in  
322 the different conditions.

323

### 324 **Dorsal horn CGRP interneurons contribute to mechanical hypersensitivity *in vivo***

325 As electrical stimulation of the dorsal root at A $\beta$  intensity readily excites the CGRP  
326 interneurons, the inability of brush stimulation to activate the neurons in the absence of  
327 injury was surprising. The discrepancy may reflect the fact that dorsal root stimulation  
328 involves a synchronous activation of many primary sensory neurons. In contrast,  
329 natural stimuli (e.g. brushing or walking on a rotarod) trigger an asynchronous afferent  
330 drive. However, as brushing was effective in the nerve injury setting, we hypothesized  
331 that a central sensitization rendered the CGRP neurons hyperexcitable. To test this

332 hypothesis we asked whether a different synchronous stimulus, namely chemogenetic  
333 (direct) activation of the CGRP interneurons, could generate behaviors indicative of  
334 mechanical allodynia, comparable to what is observed in response to innocuous  
335 mechanical stimuli in the setting of nerve injury.

336 In these studies, we used an intersectional approach to target expression of a Designer  
337 Receptor Exclusively Activated by Designer Drugs (DREADD) selectively in the CGRP  
338 interneurons. To this end, we crossed the CGRP<sup>CreER</sup> mice to a FlpO mouse line, driven  
339 by the Lbx1 gene. The latter gene is only expressed in neurons of dorsal spinal cord  
340 and hindbrain, but not in sensory neurons of the DRG (Bourane, Grossmann, et al.,  
341 2015). We then made a unilateral microinjection of an adenoassociated virus (AAV)  
342 expressing a Cre and FlpO-dependent DREADD (hM3Dq) into the dorsal horn of the  
343 CGRP<sup>CreER</sup>/FlpO mice. Four weeks later we evaluated the behavioral effects of a  
344 systemic injection of CNO, which activates the DREADD.

345 We first established that there was no constitutive effect of virus infection. Thus, CNO  
346 injection, compared to saline, did not alter the latency to fall from an accelerating  
347 rotarod (Figure 8c). Furthermore, baseline von Frey mechanical thresholds of the  
348 DREADD-expressing mice, measured prior to injection of CNO, did not differ from mice  
349 injected with the AAV-GFP virus. In distinct contrast, Figure 8 shows that CNO injection  
350 in the experimental group produced a significant reduction of von Frey threshold of the  
351 ipsilateral hindpaw, compared to baseline or to saline-injected mice (Figure 8b).  
352 Mechanical thresholds did not change from baseline in the AAV-GFP control animals,  
353 whether they received saline or CNO (Repeated Measures Two-way ANOVA,  
354  $F_{(1,20)}=6.964$ ,  $p=0.012$ , interaction effect between DREADD group and CNO treatment).  
355 The groups contained the same numbers of males and females (DREADD animals: 8  
356 of each; GFP controls: 3 of each), but there was no significant interaction between sex  
357 and treatment (CNO versus saline). Nor did factoring in sex reduce the error ( $R^2$ ) in the  
358 full Repeated Measures Two-way ANOVA.

359

360 Lastly, we evaluated heat and cold responsiveness after CNO injection. Neither latency  
361 to withdraw the hindpaw to noxious heat in the Hargreaves test ( $n = 16$ ; Figure 8d) nor  
362 time spent paw lifting after exposure of the plantar surface of the hindpaw to a cold  
363 (acetone) stimulus ( $n = 11$ ; Figure 8e), differed when comparing CNO and control  
364 saline injection ( $p > 0.05$ , Students T-test and Wilcoxon Signed Ranks Test,  
365 respectively). We conclude that direct and synchronous activation of the CGRP  
366 interneurons produces a selective mechanical hypersensitivity, mimicking the  
367 mechanical allodynia observed in response to low threshold ( $A\beta$ ) mechanical  
368 stimulation (brush) in the setting of nerve injury.

369

370 **Figure 8. Dorsal horn CGRP interneurons contribute to mechanical**  
371 **hypersensitivity *in vivo*.**

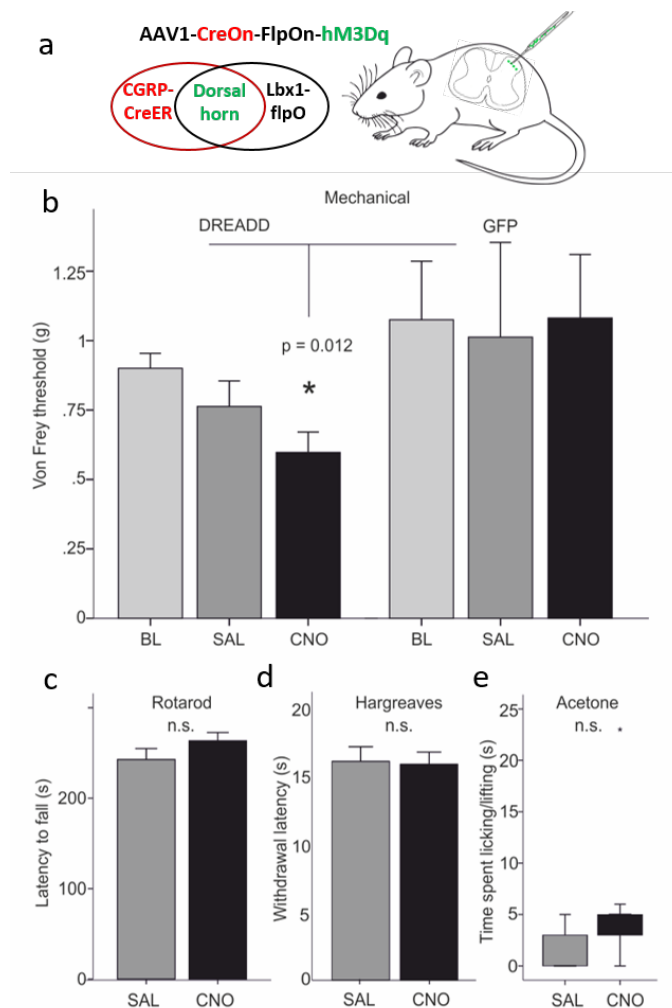

372 **Figure 8. a)** CGRP<sup>CreER</sup> mice were crossed to an Lbx1-driven FlpO mouse line, which restricts  
373 Cre expression to Lbx1-expressing neurons in the dorsal spinal cord and hindbrain. We then  
374 injected a Cre and Flp-dependent DREADD (hM3Dq) virus (AAV1-CreOn-FlpOn-hM3Dq) or a  
375 GFP-expressing AAV into the lumbar dorsal horn. **b)** Baseline (BL) von Frey mechanical  
376 thresholds of the DREADD-expressing mice (n=16; light grey bars) did not differ from baseline  
377 thresholds of mice injected with the AAV-GFP (GFP) control virus (n=6). In contrast, CNO  
378 injection significantly reduced von Frey thresholds (CNO, black bars) of the ipsilateral hindpaw  
379 in the DREADD-injected mice, compared either to their baseline, to the GFP controls or to saline  
380 (SAL; light grey bars)-injected mice (Repeated measures Two-way ANOVA, p=0.012). Neither  
381 latency to fall from a rotarod **(c)**, withdrawal to noxious heat in the Hargreaves test **(d)**, nor time  
382 spent paw lifting after exposure of the paw to a cold stimulus (acetone) **(e)** differed when  
383 comparing CNO and the control saline injection (p > 0.05, Students T-test and Wilcoxon Signed  
384 Ranks Test, respectively).

385

### 386 **CGRP interneurons and itch**

387 Based on their single cell transcriptome analysis, Häring and colleagues (Haring et al.,  
388 2018) concluded that several populations of dorsal horn excitatory neurons that  
389 express CGRP mRNA co-express gastrin-releasing peptide (GRP), a peptide linked to  
390 dorsal horn circuits that drive itch-provoked scratching (Albisetti et al., 2019; Sun &  
391 Chen, 2007). To confirm this, we performed double *in situ* hybridization for CGRP and  
392 GRP. Although the GRP interneurons predominated in a band just dorsal to the CGRP  
393 interneurons, consistent with our previous report (Solorzano et al., 2015), we did find  
394 several instances of co-localization of CGRP mRNA and GRP mRNA. Interestingly,  
395 however, when using immunohistochemistry, we found almost no overlap of GRP and  
396 CGRP in a double transgenic GRP-GFP/CGRP-tdTomato mouse line (Supplementary  
397 Figure 10 a-d). Despite these discordant findings, we also examined the pattern of Fos  
398 expression provoked by injection of chloroquine (CQ), a strong pruritogen, into the  
399 cheek or hindpaw. To prevent scratching-induced Fos, the CQ injections were  
400 performed in anesthetized mice. As Supplementary Figure 10e-f illustrates, despite

401 considerable chloroquine-induced Fos expression, we found only an occasional double-  
402 labeled neuron. We conclude that the CGRP interneurons, despite some overlap with  
403 GRP, likely do not transmit chemical itch, a finding consistent with the effects of  
404 deleting  $ROR\alpha$  (Bourane, Grossmann, et al., 2015). Whether the CGRP interneurons  
405 are engaged in conditions in which mechanical stimulation can trigger itch (alloknesis)  
406 remains to be determined.

407

## 408 **DISCUSSION**

409 Despite overwhelming evidence that primary sensory neurons are the predominant  
410 source of dorsal horn CGRP, here we describe a morphologically uniform population of  
411 dorsal horn CGRP-expressing interneurons. Many of these interneurons correspond to  
412 the CCK-negative subset of the  $ROR\alpha$  population in lamina III of the dorsal horn and  
413 trigeminal nucleus caudalis, are excitatory and are activated by electrical stimulation of  
414 non-nociceptive,  $A\beta$  primary afferents. In contrast to the CCK-expressing subset of  
415  $ROR\alpha$  neurons, and despite their location in the so-called, low threshold  
416 mechanorecipient zone of the dorsal horn (Abraira et al., 2017), the CGRP interneurons  
417 do not express Fos in response to natural  $A\beta$ -mediated, innocuous mechanical  
418 stimulation (brushing or walking on a rotarod). As for the  $ROR\alpha$  population, the CGRP  
419 interneurons do not respond to noxious chemical stimulation. Even peripheral nerve  
420 injury, without superimposed stimulation, did not activate these neurons. On the other  
421 hand, brush stimulation in the nerve injury setting did activate the CGRP interneurons.  
422 This distinction suggests that unless these neurons are rendered hyperexcitable, as  
423 occurs after nerve injury, only synchronous afferent input is sufficient to engage the  
424 circuits in which the CGRP interneurons participate. Consistent with this conclusion,  
425 chemically-provoked (chemogenetic) synchronous activation of these neurons  
426 produced a significant mechanical hypersensitivity. Based on the predominant  
427 ventrally-directed axonal arbors of these interneurons we suggest that the dorsal horn

428 CGRP interneurons contribute either to ascending circuits originating in deep dorsal  
429 horn or to the reflex circuits through which nerve-injury induced mechanical allodynia is  
430 manifest.

431

432 RNA-Seq analyses have now defined at least 15 subsets of excitatory interneurons and  
433 15 subsets of inhibitory neurons in the dorsal horn of the spinal cord (Haring et al.,  
434 2018; Sathyamurthy et al., 2018). Ablation, optogenetic and chemogenetic studies  
435 further characterized those classes based on functional properties. Of note, an  
436 increasing number of dorsal horn interneurons that “gate” mechanical pain have been  
437 identified. These include neurochemically distinct excitatory interneuron populations:  
438 transient VGLUT3, somatostatin, ROR $\alpha$ , calretinin and Tac1 (Bourane, Duan, et al.,  
439 2015; Cheng et al., 2017; Duan et al., 2014; Huang et al., 2019; Peirs et al., 2015;  
440 Petitjean et al., 2019) and distinct inhibitory interneuron populations: dynorphin,  
441 calretinin, parvalbumin and enkephalin (Boyle et al., 2019; Duan et al., 2014; Francois  
442 et al., 2017; Petitjean et al., 2019; Petitjean et al., 2015). The CGRP-expressing  
443 interneurons define yet another population of dorsal horn interneurons that contributes  
444 to spinal cord processing of mechanical inputs. Interestingly, there is a striking laminar  
445 organization of these molecularly distinct populations of interneurons. For example, the  
446 transiently expressing VGLUT3 population is located ventral to the CGRP interneurons,  
447 receives low-threshold mechanoreceptive input and their chemogenetic activation also  
448 enhances mechanical sensitivity (Cheng et al., 2017; Peirs et al., 2015). Dorsal to the  
449 CGRP interneuron are PKC $\gamma$  and calretinin excitatory interneurons that contribute to  
450 nerve injury induced mechanical allodynia (Malmberg et al., 1997; Neumann et al.,  
451 2008; Peirs et al., 2015; Petitjean et al., 2019; Smith et al., 2019).

452 To what extent these mechanically-driven neuronal populations are interconnected or  
453 whether they represent parallel, independent circuits activated under different  
454 mechanical pain conditions (e.g. naïve vs injury vs inflammation) remains to be



455 determined. Here the unique morphology of the CGRP interneurons is instructive. In  
456 contrast to many of the interneuron populations whose axons arborize longitudinally  
457 (e.g. PKC $\gamma$  cells) or dorsally (e.g. calretinin cells), the CGRP interneurons have  
458 ventrally-directed axons. In some respects, the CGRP interneurons resemble the  
459 lamina II radial cells described by Grudt and Perl (Grudt & Perl, 2002) in the mouse,  
460 many of which are nociceptive, and the lamina III interneurons demonstrated in Golgi  
461 preparations in the cat and primate (Beal & Cooper, 1978; Maxwell, 1985). The fact that  
462 the CGRP interneurons show delayed firing patterns is also consistent with the  
463 properties of excitatory lamina II radial cells (Dickie et al., 2019; Grudt & Perl, 2002;  
464 Punnakal, von Schoultz, Haenraets, Wildner, & Zeilhofer, 2014; Yasaka, Tiong,  
465 Hughes, Riddell, & Todd, 2010). Surprisingly, despite their dorsal dendrites, which  
466 extend into lamina II, where many nociceptive afferents terminate, we found no  
467 evidence that the CGRP interneurons are activated by acute noxious inputs (capsaicin  
468 or formalin). On the other hand, we did detect an occasional polysynaptic input  
469 following synchronous electrical stimulation of primary afferent C fibers. Most  
470 importantly, compared to the lamina II radial cells, we recorded much more extensive  
471 ventral axon trajectories of the CGRP interneurons, which suggests that these  
472 interneurons engage very different circuits in the dorsal and potentially ventral horn. In  
473 this regard, the CGRP interneurons are distinct from the calretinin interneurons that  
474 target lamina I projection neurons (Petitjean et al., 2019).

475  
476 An RNA sequencing study of dorsal horn interneurons demonstrated expression of  
477 *calca*, the gene that encodes CGRP, in different clusters of neurons (Haring et al.,  
478 2018), including several that express *rora*, the gene that encodes ROR $\alpha$ . Consistent  
479 with those results, our *in situ* hybridization studies found extensive co-expression of  
480 *calca* and *rora*. In fact, almost 55% of the CGRP interneurons co-express ROR $\alpha$   
481 message and there are significant similarities in their anatomical and functional

482 properties (Bourane, Grossmann, et al., 2015). Specifically, the majority of ROR $\alpha$   
483 interneurons are excitatory and approximately 1/3 has a radial morphology, with  
484 ventrally arborizing axons. Furthermore, both the CGRP and ROR $\alpha$  interneurons  
485 receive a monosynaptic A $\beta$  afferent input and interestingly, despite the lack of response  
486 to capsaicin, some neurons in both populations receive a polysynaptic A delta and C  
487 input. Consistent with the report that deletion of the ROR $\alpha$  population did not influence  
488 itch (Bourane, Grossmann, et al., 2015), and despite some overlap of the CGRP and  
489 GRP subsets of interneurons, we found that pruritogens did not activate the CGRP  
490 interneurons, namely did not induce Fos (Supplementary Figure 10). There are,  
491 however, some striking differences between the ROR $\alpha$  and CGRP interneurons. For  
492 example, although a majority of the ROR $\alpha$  interneurons co-express CCK, the CGRP  
493 interneurons rarely do. Furthermore, whereas ROR $\alpha$  interneurons are activated by  
494 innocuous mechanical stimuli (e.g. brushing) in both naïve and injured conditions, the  
495 CGRP interneurons respond to innocuous stimuli only in the setting of nerve injury.

496

497 To our knowledge, the CGRP interneurons represent the first class of excitatory  
498 interneurons in lamina III that are unresponsive to innocuous mechanical stimulation  
499 under basal conditions despite receiving a monosynaptic A $\beta$  input. One possibility is  
500 that the CGRP interneurons are tonically inhibited under normal conditions. Reduction  
501 of these inhibitory inputs in the setting of injury (Torsney & MacDermott, 2006) would  
502 render the neurons responsive to an innocuous stimulus (e.g. brush). In turn, the  
503 ventrally-directed axons of these interneurons could drive reflex withdrawal circuits,  
504 and/or engage ascending nociceptive pathways located in deep dorsal horn. The fact  
505 that DREADD-mediated direct activation of many CGRP interneurons lowered  
506 mechanical withdrawal thresholds is consistent with that hypothesis. In other words, we  
507 suggest that sensitization of these neurons is critical to mechanisms that underlie A $\beta$ -  
508 mediated mechanical allodynia in the setting of nerve injury. Interestingly, Lu et al (Lu

509 et al., 2013) provided evidence for convergence of a primary afferent-derived A $\beta$  and a  
510 tonic glycinergic inhibitory input to PKC $\gamma$  interneurons, some of which we found express  
511 CGRP. Loss of this glycinergic inhibition allowed A $\beta$  input to access lamina I  
512 nociceptive circuits. Other studies demonstrated a comparable outcome, in this case by  
513 a presynaptic glycinergic inhibition of non-nociceptive inputs to superficial dorsal horn  
514 neurons (Sherman & Loomis, 1996). Furthermore, Imlach et al (Imlach, Bhola,  
515 Mohammadi, & Christie, 2016) proposed that decreased glycinergic inhibition is  
516 selective for radial cells in lamina II and likely contributes to neuropathic pain. We  
517 suggest that a comparable circuit involving the CGRP radial cells could uncover low  
518 threshold inputs to ventrally located nociceptive circuits, which in recent years have  
519 been largely ignored (Wercberger and Basbaum, 2019).

520

521

## 522 **MATERIALS AND METHODS**

523

524 **Animals.** Mice were housed in cages on a standard 12:12 hour light/dark cycle with  
525 food and water ad libitum. Permission for all animal experiments was obtained and  
526 overseen by the Institutional Animal Care and Use Committee (IACUC) at the  
527 University of California San Francisco. All experiments were carried out in accordance  
528 with the National Institutes of Health Guide for the Care and Use of Laboratory Animals  
529 and the recommendations of the International Association for the Study of Pain.

530 **Mouse strains** The CGRP<sup>CreER</sup> mouse strain was kindly provided by Dr. Pao-Tien  
531 Chuang (UC San Francisco) (Song et al., 2012). CGRP<sup>CreER</sup> mice were then bred with  
532 C57BL/6J -Ai14 mice (Jackson Laboratory, Stock No: 007914) or with mice that  
533 selectively express green fluorescent protein (GFP) in gastrin-releasing peptide (GRP)-  
534 expressing cells (GRP-GFP mouse (Solorzano et al., 2015)). Lbx1FlpO mice, in which

535 FlpO is driven from the Lbx1 promoter, were a kind gift from Dr. Martin Goulding at the  
536 Salk Institute, La Jolla CA.

537 **Tamoxifen** We dissolved tamoxifen (T5648, Sigma-Aldrich) in corn oil and injected it  
538 (150 mg/kg, i.p.) into the CGRP-tdTomato mice on two consecutive days. For  
539 immunohistochemistry, electrophysiology and tracing experiments we injected the  
540 tamoxifen into P21-22 mice. We waited 5 and 7-10 days before recording and perfusion  
541 for immunostaining, respectively. For Fluorogold (1%) tracing experiments, we injected  
542 the tracer into 6-8 week old mice. For intraspinal surgeries intended for DREADD  
543 receptor expression studies, we injected tamoxifen into P11-12 mice and subsequently,  
544 between P14-16, made an intraspinal injection of hM3Dq without laminectomy.

545 **Fluorescence Immunohistochemistry (IHC)** Mice of either sex were transcardially  
546 perfused with 10 mL phosphate-buffered saline (PBS) followed by 30 mL cold 4%  
547 formaldehyde in PBS. After dissection, dorsal root ganglia (DRG), trigeminal ganglia  
548 (TG), spinal cord and caudal medullary tissue were post fixed for ~3 hours at room  
549 temperature and subsequently cryoprotected in 30% sucrose in PBS overnight at 4°C.  
550 The spinal cord and caudal medulla were sectioned in a cryostat at 25 µm; DRG and  
551 TG at 16 µm. After mounting and drying on slides, the sections were incubated for 1.5  
552 hours in 10% normal goat serum with 0.3% Triton X-100 (NGST) to block non-specific  
553 antibody binding, and then for 24 hours in primary antibodies diluted in 10% NGST. The  
554 sections were then washed 3 times for 10 minutes in PBS and then incubated for 2  
555 hours with a secondary antibody diluted in 1% NGST. After washing with PBS 3 times  
556 for 10 minutes, the sections were dried and coverslipped with Fluoromount G.

557 The following primary antibodies were used: rabbit anti-CGRP (1:1000, Peninsula),  
558 rabbit anti-calbindin (1:2000, Swant), mouse anti-calretinin (1:5000, Swant), guinea pig  
559 anti-PKC $\gamma$  (1:7000, Strategic Bio), chicken anti-GFP (1:2500, Abcam), rabbit anti-Fos  
560 (1:5000, Calbiochem; 1:2000, Cell Signaling), guinea pig anti-Fluorogold (1:1000,

561 Protos Biotech), guinea pig anti-Lmx1b (1:10000, kind gift from T. Müller and C.  
562 Birchmeier, Max Delbrück Center for Molecular Medicine, Berlin, Germany), rabbit anti-  
563 Pax2 (1:4000, Abcam), or rabbit anti HA (1:800, Cell Signaling). Secondary antibodies  
564 were conjugated to Alexa-488 or Alexa-647 (1:1000, Thermo Fisher Scientific).

565 **Capsaicin treatment.** To ablate the central terminals of CGRP-expressing DRG  
566 neurons, CGRP-tdTomato mice were anesthetized with 2% isoflurane and injected  
567 intrathecally with 5.0  $\mu$ l of a solution containing 10  $\mu$ g of capsaicin, dissolved in 10%  
568 ethanol, 10% Tween-80 and 80% saline. Five days later, the mice received 5 i.p.  
569 injections of 150 mg/kg tamoxifen (one injection per day, on 5 consecutive days).  
570 Seven days later, the mice were processed for immunohistochemistry.

571 **Peroxidase immunocytochemistry.** Mice were perfused with phosphate-buffered 4%  
572 formaldehyde (n=3) or 4% formaldehyde plus 0.3% glutaraldehyde (n=5). Transverse  
573 or parasagittal Vibratome sections (50  $\mu$ m) were processed for detection of tdTomato  
574 for either light (LM) or electron microscopic (EM) (Llewellyn-Smith, Basbaum, & Braz,  
575 2018) examination.

576 **Electron microscopy.** For EM analysis, the sections were washed for 2 h in 50%  
577 ethanol, incubated for 30 min in 10% normal horse serum diluted with Tris-PBS  
578 (TPBS), then in 1:25,000 or 1:100,000 rabbit anti DSRRed (Takara Bio USA) in 10%  
579 NHS-TPBS. The sections were subsequently exposed to 1:500 biotinylated donkey  
580 anti-rabbit IgG (Jackson ImmunoResearch) in 1% NHS-TPBS and then to 1:1500  
581 ExtrAvidin-horseradish peroxidase (Sigma-Aldrich) in TPBS. Incubations in  
582 immunoreagents were for 3 days at room temperature on a shaker; sections were  
583 washed 3  $\times$  30 min between incubations. To visualize CGRP-tdTomato-  
584 immunoreactivity in the dorsal horn, we used a nickel-intensified diaminobenzidine  
585 (DAB) reaction and hydrogen peroxide generated by glucose oxidase (Llewellyn-Smith,  
586 Dicarlo, Collins, & Keast, 2005). After the peroxidase reaction, sections containing

587 tdTomato-immunoreactive neurons were osmicated, stained *en bloc* with aqueous  
588 uranyl acetate, dehydrated with acetone and propylene oxide, and infiltrated with  
589 Durcupan resin (Sigma-Aldrich). Finally, sections were embedded on glass slides under  
590 Aclar coverslips (Electron Microscopy Sciences) and polymerized at 60°C for at least  
591 48 hr. Dorsal horn regions containing CGRP-tdTomato neurons were re-embedded in  
592 resin on blank blocks under glass coverslips and repolymerized. Ultrathin sections were  
593 collected on copper mesh grids, stained with aqueous uranyl acetate, and examined  
594 with a JEOL 100CXII transmission electron microscope.

595 **LM analysis.** Transverse or parasagittal Vibratome sections of tissue from mice  
596 perfused with phosphate-buffered 4% formaldehyde (n=3) or 4% formaldehyde, 0.3%  
597 glutaraldehyde (n=3) were either single stained to show tdTomato-immunoreactivity or  
598 double stained to demonstrate the relationships between VGLUT1-immunoreactive  
599 axons and CGRP-tdTomato neurons. All sections were washed 3 x 20 min in TPBS  
600 containing 0.3% Triton X-100 and exposed to 10% NHS in TPBS-Triton for 30 min.  
601 Single labeling involved exposure of sections to 1:25,000 or 1:100,000 anti-DSRed  
602 (Takara), 1:500 anti-rabbit IgG, 1:1500 ExtrAvidin-HRP and a nickel-intensified DAB  
603 reaction. For double labeling, VGLUT1-immunoeractivity was first detected with  
604 1:50,000 or 1:100,000 rabbit anti-VGLUT1 (Synaptic Systems), biotinylated donkey  
605 anti-rabbit IgG, ExtrAvidin-horseradish peroxidase and a cobalt+nickel-intensified DAB  
606 reaction (Llewellyn-Smith et al., 2005). Then, after another blocking step in 10% NHS,  
607 DSRed-immunoreactivity was detected as for single labeling except that the peroxidase  
608 reaction was intensified with imidazole (Llewellyn-Smith et al., 2005) rather than nickel.  
609 For LM labeling, primary antibodies were diluted with 10% NHS in TPBS-Triton;  
610 secondary antibodies, in 1% NHS-TPBS-Triton; and avidin-HRP complex, in TPBS-  
611 Triton. For LM, all incubations in immunoreagents were done on a shaker at room  
612 temperature for at least 24 hours and washes between incubations were 3 x 20 min in



613 TPBS. Stained sections were mounted on subbed slides, dehydrated and coverslipped  
614 with Permaslip Mounting Medium (Alban Scientific).

615 ***In situ* hybridization (ISH).** *In situ* hybridization was performed using fresh spinal cord  
616 or caudal medullary tissue from adult mice (8–10-week-old), except for transient  
617 VGLUT3 assessment (Peirs et al., 2015), where the mice were 7 days old. We followed  
618 the protocol outlined by Advanced Cell Diagnostics (Newark, CA). The tissue was  
619 dissected out, instantaneously frozen on dry ice, and kept at –80°C until use. Cryostat  
620 sections of DRG (12 µm) were fixed at 4°C in 4% formaldehyde for 15 min, washed  
621 twice in PBS, and dehydrated through successive 5 minute ethanol steps (50%, 70%,  
622 and 100%) and then dried at room temperature. After a 30 min incubation with protease  
623 IV, sections were washed twice in PBS and incubated at 40°C with RNAscope-labeled  
624 mouse probes: calcitonin gene-related peptide (CGRP), RAR-related orphan receptor  
625 alpha (ROR $\alpha$ ), cholecystokinin (CCK), vesicular glutamate transporter 3 (VGLUT3),  
626 neurokinin receptor 1 (NK1R), gastrin releasing peptide (GRP) for 2 h in a humidified  
627 chamber. Sections were then washed twice in washing buffer and incubated with four  
628 15-30 minute “signal amplifying” solutions at 40°C. After two washes, the sections were  
629 dried and covered with mounting media containing 4',6-diamidino-2-phenylindole  
630 (DAPI).

631 **Image analysis.** Images of fluorescent immunostained sections were acquired on an  
632 LSM 700 confocal microscope using ZEN Software (Carl Zeiss). The microscope was  
633 equipped with 405, 488, 555, and 639 nm diode lasers. For co-localization studies we  
634 used a 20x Plan-Apochromat (20 $\times$ /0.8) objective (Zeiss) and image dimensions of 1024  
635  $\times$  1024 pixels with an image depth of 12 bits. Two times averaging was applied during  
636 image acquisition. Laser power and gain were adjusted to avoid saturation of single  
637 pixels and kept constant for each experiment. Image acquisition was performed with  
638 fixed exposure times for each channel and a 10% overlap of neighboring images where  
639 tiling was used. Stitching was done in ZEN using the “stitching/fuse tiles” function.

640 Adjustment of brightness/contrast and maximum projections of Z-stack images were  
641 done in Fiji/Image J. All images of the same experiment were processed in an identical  
642 manner.

643 Images of peroxidase immunostained sections were acquired on an Olympus BH2  
644 brightfield microscope equipped with SPlanApo lenses and a SPOT Insight CMOS  
645 Color Mosaic 5MP camera running SPOT 5.3 Advanced software. For assessment of  
646 VGLUT1 appositions on DSRed-immunoreactive CGRP neurons, an x100 oil  
647 immersion lens was used. A VGLUT1-positive terminal was classified as forming a  
648 close apposition when (1) there was no space between the terminal and the DSRed-  
649 positive neuron for terminals lying side-by-side with a cell body or dendrite or when (2)  
650 the terminal and the DSRed-positive neuron were in the same focal plane for terminals  
651 overlying cell bodies or dendrites.

652 **Cell counts.** To analyze overlap by immunohistochemistry or *in situ* hybridization, we  
653 counted cells from 4-5 sections in at least 3 animals per experiment. By  
654 immunohistochemistry, we first counted the number of neurons in the DRG and TG that  
655 were tdTomato-positive (total 1266 cells, 3 mice) or CGRP-positive (total 1050 cells, 3  
656 mice) and then determined the percentage of tdTomato-positive neurons that were  
657 CGRP double-labeled and vice versa. The number of dorsal horn tdTomato-positive  
658 cells that double-labeled for different markers (e.g. PKC $\gamma$ , Lmx1b, Fos, calretinin,  
659 calbindin) are indicated in the Results. To conclude that cells were double-labeled by *in*  
660 *situ* hybridization we set a threshold of at least 5 fluorescent “dots” for each probe in  
661 conjunction with a DAPI-positive nucleus.

662 **Viral vectors.** For DREADD experiments we used a Cre and FlpO-dependent  
663 hM3D(Gq) adeno-associated virus: AAV1--hEF1alpha/hTLV1-Fon/Con[dFRT-  
664 HA\_hM3D(Gq)-dlox-hM3D(Gq)-l-dlox-l-HA\_hM3D(Gq)(rev)-dFRT]-WPRE-hGHp  
665 custom made by the University of Zurich Viral Vector Facility of the Neuroscience

666 Center. For control injections we used an AAV1.hSyn.eGFP.WPRE.SV40 from  
667 Addgene. For GCaMP-tracing experiments we used an  
668 AV1.Syn.Flex.GCaMP6s.WPRE.SV40 from the Penn Vector Core, University of  
669 Pennsylvania. Note that we evaluated several Cre-dependent viral vectors for the  
670 tracing studies and only used those where specificity of expression was confirmed by  
671 lack of expression after injection into WT mice. We waited at least 4 weeks to achieve  
672 stable viral expression before beginning the behavioral or neuroanatomical  
673 experiments.

674 **Retrograde tracing.** To study potential projection targets of the dorsal horn CGRP  
675 interneurons, we injected Fluorogold (1%) into several supraspinal sites known to  
676 receive projections from the spinal and medullary dorsal horns. We studied two mice for  
677 each location and allowed 5-9 days for tracer transport after which the mice were  
678 perfused with formaldehyde for subsequent histological analysis. We injected tracer  
679 into the following locations: ventrolateral thalamus (X:ML=1.5, Y:AP=-1.82, Z:DV=3.5;  
680 500 or 800 nl); parabrachial nucleus (X=1.25, Y=-4.95, Z=-3.6; 600 nl); nucleus  
681 submedius of the thalamus (X=0.5, Y=-1.43, Z=4.25; 250 or 450 nl); dorsal column  
682 nuclei (400 nl).

683 **AAV injections.** For all surgeries, the mice were administered carprofen (0.1 mg/kg,  
684 i.p.) just prior to surgery and lidocaine (0.5%) was applied to the incision site. For the  
685 DREADD experiments, under 2% isoflurane anesthesia we injected P14-16 CGRP<sup>creER</sup>-  
686 LbxflpO mice and littermates with an AAV-GFP. We removed muscles that overlay the  
687 left side of the T13 and L1 vertebra to expose the lumbar enlargement. Without  
688 laminectomy, we then slowly inserted a glass micropipette (50  $\mu$ m tip) through the dura  
689 and made two 400 nl rostrocaudally separated injections of viral solution. The  
690 micropipette was left in place for ~2 minutes after which overlying muscle and skin  
691 were closed. After recovering from the anesthesia, the mice were returned to their  
692 home cages.

693 For the GCaMP6 tracing studies we made injections (300 - 800 nl) into the medullary  
694 dorsal horn in 8 week old mice anesthetized with i.p. ketamine (100 mg/kg) and  
695 xylazine (10 mg/kg) or isofluorane (2%). For injections into the nucleus caudalis, we  
696 incised the dura overlying the cisterna magna, exposing the caudal medulla and made  
697 a unilateral injection of viral solution with a glass micropipette. After recovering from  
698 anesthesia the mice were returned to their home cage.

699 **Behavioral analyses.** We took several measures to blind the behavioral experiments.  
700 1) DREADD-injected and control (GFP-injected) mice were housed together. 2) A  
701 different experimenter performed the injections of CNO (5.0 mg/kg in saline) or saline  
702 before behavioral testing. 3) The behavioral tester recorded each mouse's eartag  
703 number after the test and was blind to the treatment (saline or CNO) that the mouse  
704 received or to which group the mouse belonged (AAV-GFP-injected or DREADD-  
705 injected). 4) Identification was made using records of eartag numbers after all testing  
706 was finalized.

707 **Static mechanical allodynia.** For these experiments, we determined hindpaw  
708 mechanical thresholds with von Frey filaments, and quantified results using the updown  
709 method (Chaplan, Bach, Pogrel, Chung, & Yaksh, 1994). The animals were habituated  
710 on a wire mesh for 2 hours on 2 consecutive days. On the next 2 days we recorded  
711 baseline thresholds, after a 1.5 hours of acclimatization on the wire mesh. After  
712 baseline determinations, the mice were injected with CNO or saline and then tested 30  
713 minutes later. For all behavioral tests, either CNO or saline was injected every other  
714 day in a randomized fashion.

715 **Acetone test (cold allodynia).** Mice were habituated for 30 minutes on a mesh in  
716 plexiglass cylinders. Next we used a syringe to squirt 50  $\mu$ l acetone onto the plantar  
717 surface of the paw. The responses of the mice directly after application of acetone were  
718 recorded on video for 30 seconds. Each paw was tested 5 times and we measured time

719 (in seconds) spent lifting, licking or flinching the paw. Results are displayed as the  
720 average time across the 5 trials. Testing began 1 hour post injection of CNO or saline,  
721 with test days 48 hours apart.

722 **Hargreaves test.** For thermal threshold testing (heat), we first acclimatized the mice for  
723 30 minutes in Plexiglass cylinders. The mice were then placed on the glass of a  
724 Hargreaves apparatus and the latency to withdraw the paw from the heat source was  
725 recorded. Each paw was tested 5 times and we averaged latencies over the 5 trials.  
726 Hargreaves tests were done 1 hour after the tests of static dynamic mechanical  
727 allodynia.

728 **Rotarod test.** Mice were acclimatized to the testing room and trained by placing them  
729 on an accelerating rotarod for a maximum of 60 sec at low speed, 3 times with training  
730 taking place on two consecutive days. On testing days (48 hours apart), mice were  
731 injected with CNO or saline 30 minutes before being placed on the rotarod. Latency to  
732 fall was measured for up to 300 seconds. The procedure was repeated 3 times and  
733 latencies averaged across trials.

734 **Spared nerve injury (SNI).** To induce mechanical hypersensitivity in a model of  
735 neuropathic pain we used the approach described by Shields et al. (Shields, Eckert, &  
736 Basbaum, 2003). Under isoflurane anesthesia (2%), two of the three branches of the  
737 sciatic nerve were ligated and transected distally, sparing the tibial nerve.

738

739 ***Fos expression: Capsaicin and formalin.*** To study the effects of a chemical algogen,  
740 we injected 10  $\mu$ l of 2% formalin in saline into the cheek (n=3). In a separate group of  
741 anesthetized animals (n=3), we made a unilateral injection of 20  $\mu$ l capsaicin (1.0  $\mu$ g/ $\mu$ l)  
742 into the hindpaw or the cheek. We perfused all mice ~1.5 hours after injection and  
743 immunostained sections of the lumbar cord (paw injections) or caudal medulla (cheek  
744 injections) for Fos.

745

746 ***Fos expression: Chloroquine***. To study the effects of a pruritogen, under isofluorane  
747 anesthesia, mice (n=3) received unilateral injections of chloroquine (200 µg) into either  
748 the hindpaw (20 µl) or cheek (50 µl). The mice were perfused ~1.5 hours after injection  
749 and sections of the lumbar cord (paw injections) or caudal medulla (cheek injections)  
750 were immunostained for Fos.

751

752 ***Fos expression: Nitroglycerin***. We injected mice (n=3) with nitroglycerin (10 mg/kg,  
753 i.p.), which in humans can trigger a migraine and in rodents provokes behavioral signs  
754 of widespread thermal hyperalgesia and mechanical hypersensitivity (Bates et al.,  
755 2010), beginning 30-60 min after injection and subsiding within 4 hours. Based on this  
756 time course, the mice were perfused 2 hours after nitroglycerin injection and sections  
757 caudal medulla were immunostained for Fos.

758 ***Fos expression: Dynamic mechanical allodynia***. To assess Fos expression in  
759 uninjured animals (n=3), we first acclimatized the mice to brushing of the cheek,  
760 (Utrecht 225, pure red sable brush 6, Germany) while lightly restraining the mouse in a  
761 towel with its head exposed. We brushed the left cheek along the direction of the hairs  
762 for 45 min, with a one minute break every 10 minutes. To monitor Fos expression in the  
763 injured animals, we performed unilateral partial sciatic nerve injury (SNI, see above).  
764 One week after SNI, we used a paintbrush (5/0, Princeton Art & Brush Co.) to lightly  
765 stroke the injured hind paw, from heel to toe (velocity: ~2 cm/s). Ninety minutes to 2  
766 hours after brushing, the mice were anesthetized, perfused and spinal cord sections  
767 were immunostained for Fos. In a separate experiment, we also assessed Fos  
768 expression one week after SNI without applying a stimulus.

769 ***Fos expression: Rotarod test***. Three mice were trained on a rotating rod for 60 min at  
770 a constant speed of 10 rpm. One week later the mice walked on the rotarod at 10 rpm



771 for 1.5 hours (Neumann et al., 2008), after which they were anesthetized, perfused and  
772 lumbar spinal cord sections immunostained for Fos.

773 **Electrophysiology.** Following our previous protocol (Etlin et al., 2016), we collected  
774 transverse lumbar and caudal medullary Vibratome (Leica) slices (350-400  $\mu\text{m}$ ) from 3-  
775 10 weeks old CGRP-tdT mice 5-7 days after tamoxifen injection. The sections were  
776 incubated in recording solution at 37°C for 1 hour and then transferred to a recording  
777 chamber (Automate Scientific) under an upright fluorescence microscope (E600FN;  
778 Nikon). The sections were superfused with recording solution at a rate of 1.0 ml/min  
779 and viewed with a CCD digital camera (Hamamatsu or DAGE-MTI). The transparent  
780 appearance of lamina II of the superficial dorsal horn and tdTomato-positive CGRP  
781 cells were obvious under near-infrared (IR) illumination. The patch pipettes were pulled  
782 to yield an impedance of 6–8 M $\Omega$  on a horizontal pipette puller (Sutter Instrument) from  
783 thin-walled, fire-polished, borosilicate glass filaments. The pipette solution composition  
784 was (in mM): K-methane sulfonate 140, NaCl 10, CaCl<sub>2</sub> 1.0, EGTA 1.0, HEPES 10, Mg-  
785 ATP 5.0, and NaGTP 0.5 and included 5.0 mg/ml of Biocytin (Sigma-Aldrich) for  
786 intracellular filling of the recorded cells. Neurons were approached with a  
787 micromanipulator (Sutter Instrument) while monitoring the resistance in voltage-clamp  
788 mode using the “Membrane Test” module of pClamp10 software (Molecular Devices).  
789 To prevent clogging of the tip, we applied positive pressure to the pipette via a 1.0 ml  
790 syringe. After a seal was established with a cell, we ruptured its membrane by gently  
791 applying negative pressure to the pipette to secure a whole-cell configuration. Current  
792 and voltage signals were amplified using a DC amplifier (MultiClamp 700) and digitized  
793 using Digidata 1440a system (Molecular Devices) at 10 kHz and then stored for  
794 subsequent offline analysis. In some experiments, we placed an attached dorsal root in  
795 a suction electrode to be stimulated electrically while simultaneously measuring evoked  
796 responses of the tdTomato-expressing neurons.

797

798 **Statistical analysis.** Statistical analyses were performed using SPSS (IBM-SPSS  
799 version 24). Similarity of normality and variance were assessed before applying  
800 parametric or non-parametric tests. For analysis of the effect of CNO on mechanical  
801 hypersensitivity, we assessed interaction between treatment (CNO, saline or baseline)  
802 with group (DREADD-virus injected animals or GFP-virus injected animals) by repeated  
803 measures two-way ANOVA, including all conditions and groups. Statistics were  
804 calculated based on a type III sum of squares model and significant interaction effects  
805 were assessed using deviation from the mean of the control groups. The N was  
806 estimated based on variance for von Frey experiments using an *a priori* power  
807 calculation. Hargreaves and rotarod results were analyzed using Student's t-tests. For  
808 acetone sensitivity we used the Wilcoxon signed rank test. Parametric and non-  
809 parametric tests are reported as mean +/- SEM or by medians and inter-quartiles,  
810 respectively. Electrophysiological recordings of intrinsic membrane and action potential  
811 properties were calculated using custom-written Matlab scripts (MathWorks, Illinois) as  
812 previously described (Etlin et al., 2016). P values were considered significant if  $p <$   
813 0.05.

814 **Acknowledgements:** This research was supported by a Sir Henry Wellcome  
815 Fellowship 092208/Z/10/Z (LSL), NIH: R35NS097306 (AIB) and Wellcome Award:  
816 A102645 (AIB). We are grateful to Dr. Hendrik Wildner, University of Zurich for sharing  
817 the Cre/Flp dependent DREADD construct and to Dr. Ling Bai, University of California  
818 San Francisco for helpful advice on surgeries.

819 **Author contributions:** LL, JMB and AIB conceptualized and designed the study. LL,  
820 AE, MB, MS, JK, KH, IL-S and JMB performed the experiments and collected the data.  
821 LL, AE, IL-S, JMB and AIB analyzed data. LL, JMB, AE, IL-S and AIB wrote the  
822 manuscript.

823 **Competing interest statement:** The authors have no competing interests to declare.

824 **REFERENCES**

825

826 Abraira, V. E., Kuehn, E. D., Chirila, A. M., Springel, M. W., Toliver, A. A., Zimmerman, A. L.,

827 . . . Ginty, D. D. (2017). The cellular and synaptic architecture of the mechanosensory

828 dorsal horn. *Cell*, 168(1-2), 295-310. doi:10.1016/j.cell.2016.12.010

829 Albisetti, G. W., Pagani, M., Platonova, E., Hosli, L., Johannssen, H. C., Fritschy, J. M., . . .

830 Zeilhofer, H. U. (2019). Dorsal horn gastrin-releasing peptide expressing neurons

831 transmit spinal itch but not pain signals. *J Neurosci*, 39(12), 2238-2250.

832 doi:10.1523/JNEUROSCI.2559-18.2019

833 Basbaum, A. I., Bautista, D. M., Scherrer, G., & Julius, D. (2009). Cellular and molecular

834 mechanisms of pain. *Cell*, 139(2), 267-284. doi:10.1016/j.cell.2009.09.028

835 Bates, E. A., Nikai, T., Brennan, K. C., Fu, Y. H., Charles, A. C., Basbaum, A. I., . . . Ahn, A.

836 H. (2010). Sumatriptan alleviates nitroglycerin-induced mechanical and thermal

837 allodynia in mice. *Cephalalgia*, 30(2), 170-178. doi:10.1111/j.1468-

838 2982.2009.01864.x

839 Beal, J. A., & Cooper, M. H. (1978). The neurons in the gelatinosal complex (Laminae II and

840 III) of the monkey (*Macaca mulatta*): a Golgi study. *J Comp Neurol*, 179(1), 89-121.

841 doi:10.1002/cne.901790107

842 Bourane, S., Duan, B., Koch, S. C., Dalet, A., Britz, O., Garcia-Campmany, L., . . . Goulding,

843 M. (2015). Gate control of mechanical itch by a subpopulation of spinal cord

844 interneurons. *Science*, 350(6260), 550-554. doi:10.1126/science.aac8653

845 Bourane, S., Grossmann, K. S., Britz, O., Dalet, A., Del Barrio, M. G., Stam, F. J., . . .

846 Goulding, M. (2015). Identification of a spinal circuit for light touch and fine motor

847 control. *Cell*, 160(3), 503-515. doi:10.1016/j.cell.2015.01.011

848 Boyle, K. A., Gradwell, M. A., Yasaka, T., Dickie, A. C., Polgar, E., Ganley, R. P., . . .

849 Hughes, D. I. (2019). Defining a spinal microcircuit that gates myelinated afferent

850 input: implications for tactile allodynia. *Cell Rep*, 28(2), 526-540.

851 doi:10.1016/j.celrep.2019.06.040

- 852 Brain, S. D., Williams, T. J., Tippins, J. R., Morris, H. R., & MacIntyre, I. (1985). Calcitonin  
853 gene-related peptide is a potent vasodilator. *Nature*, 313(5997), 54-56.  
854 doi:10.1038/313054a0
- 855 Cavanaugh, D. J., Lee, H., Lo, L., Shields, S. D., Zylka, M. J., Basbaum, A. I., & Anderson,  
856 D. J. (2009). Distinct subsets of unmyelinated primary sensory fibers mediate  
857 behavioral responses to noxious thermal and mechanical stimuli. *Proc Natl Acad Sci*  
858 *U S A*, 106(22), 9075-9080. doi:10.1073/pnas.0901507106
- 859 Chaplan, S. R., Bach, F. W., Pogrel, J. W., Chung, J. M., & Yaksh, T. L. (1994). Quantitative  
860 assessment of tactile allodynia in the rat paw. *J Neurosci Methods*, 53(1), 55-63.  
861 doi:10.1016/0165-0270(94)90144-9
- 862 Cheng, L., Duan, B., Huang, T., Zhang, Y., Chen, Y., Britz, O., . . . Ma, Q. (2017).  
863 Identification of spinal circuits involved in touch-evoked dynamic mechanical pain. *Nat*  
864 *Neurosci*, 20(6), 804-814. doi:10.1038/nn.4549
- 865 Cowie, A. M., Moehring, F., O'Hara, C., & Stucky, C. L. (2018). Optogenetic inhibition of  
866 CGRPalpha sensory neurons reveals their distinct roles in neuropathic and incisional  
867 Pain. *J Neurosci*, 38(25), 5807-5825. doi:10.1523/JNEUROSCI.3565-17.2018
- 868 Dickie, A. C., Bell, A. M., Iwagaki, N., Polgar, E., Gutierrez-Mecinas, M., Kelly, R., . . . Todd,  
869 A. J. (2019). Morphological and functional properties distinguish the substance P and  
870 gastrin-releasing peptide subsets of excitatory interneuron in the spinal cord dorsal  
871 horn. *Pain*, 160(2), 442-462. doi:10.1097/j.pain.0000000000001406
- 872 Duan, B., Cheng, L., Bourane, S., Britz, O., Padilla, C., Garcia-Campmany, L., . . . Ma, Q.  
873 (2014). Identification of spinal circuits transmitting and gating mechanical pain. *Cell*,  
874 159(6), 1417-1432. doi:10.1016/j.cell.2014.11.003
- 875 Etlin, A., Braz, J. M., Kuhn, J. A., Wang, X., Hamel, K. A., Llewellyn-Smith, I. J., & Basbaum,  
876 A. I. (2016). Functional synaptic integration of forebrain GABAergic precursors into  
877 the adult spinal cord. *J Neurosci*, 36(46), 11634-11645.  
878 doi:10.1523/JNEUROSCI.2301-16.2016

- 879 Francois, A., Low, S. A., Sypek, E. I., Christensen, A. J., Sotoudeh, C., Beier, K. T., . . .  
880 Scherrer, G. (2017). A brainstem-spinal cord inhibitory circuit for mechanical pain  
881 modulation by GABA and enkephalins. *Neuron*, 93(4), 822-839.  
882 doi:10.1016/j.neuron.2017.01.008
- 883 Grudt, T. J., & Perl, E. R. (2002). Correlations between neuronal morphology and  
884 electrophysiological features in the rodent superficial dorsal horn. *J Physiol*, 540(Pt  
885 1), 189-207. doi:10.1113/jphysiol.2001.012890
- 886 Haring, M., Zeisel, A., Hochgerner, H., Rinwa, P., Jakobsson, J. E. T., Lonnerberg, P., . . .  
887 Ernfors, P. (2018). Neuronal atlas of the dorsal horn defines its architecture and links  
888 sensory input to transcriptional cell types. *Nat Neurosci*, 21(6), 869-880.  
889 doi:10.1038/s41593-018-0141-1
- 890 Ho, T. W., Edvinsson, L., & Goadsby, P. J. (2010). CGRP and its receptors provide new  
891 insights into migraine pathophysiology. *Nat Rev Neurol*, 6(10), 573-582.  
892 doi:10.1038/nrneurol.2010.127
- 893 Huang, T., Lin, S. H., Malewicz, N. M., Zhang, Y., Zhang, Y., Goulding, M., . . . Ma, Q.  
894 (2019). Identifying the pathways required for coping behaviours associated with  
895 sustained pain. *Nature*, 565(7737), 86-90. doi:10.1038/s41586-018-0793-8
- 896 Imlach, W. L., Bholra, R. F., Mohammadi, S. A., & Christie, M. J. (2016). Glycinergic  
897 dysfunction in a subpopulation of dorsal horn interneurons in a rat model of  
898 neuropathic pain. *Sci Rep*, 6, 37104. doi:10.1038/srep37104
- 899 Kruger, L., Sternini, C., Brecha, N. C., & Mantyh, P. W. (1988). Distribution of calcitonin  
900 gene-related peptide immunoreactivity in relation to the rat central somatosensory  
901 projection. *J Comp Neurol*, 273(2), 149-162. doi:10.1002/cne.902730203
- 902 Liu, Y., Latremoliere, A., Li, X., Zhang, Z., Chen, M., Wang, X., . . . He, Z. (2018). Touch and  
903 tactile neuropathic pain sensitivity are set by corticospinal projections. *Nature*,  
904 561(7724), 547-550. doi:10.1038/s41586-018-0515-2

- 905 Llewellyn-Smith, I. J., Basbaum, A. I., & Braz, J. M. (2018). Long-term, dynamic synaptic  
906 reorganization after GABAergic precursor cell transplantation into adult mouse spinal  
907 cord. *J Comp Neurol*, 526(3), 480-495. doi:10.1002/cne.24346
- 908 Llewellyn-Smith, I. J., Dicarlo, S. E., Collins, H. L., & Keast, J. R. (2005). Enkephalin-  
909 immunoreactive interneurons extensively innervate sympathetic preganglionic  
910 neurons regulating the pelvic viscera. *J Comp Neurol*, 488(3), 278-289.  
911 doi:10.1002/cne.20552
- 912 Lu, Y., Dong, H., Gao, Y., Gong, Y., Ren, Y., Gu, N., . . . Xiong, L. (2013). A feed-forward  
913 spinal cord glycinergic neural circuit gates mechanical allodynia. *J Clin Invest*, 123(9),  
914 4050-4062. doi:10.1172/JCI70026
- 915 Malmberg, A. B., Chen, C., Tonegawa, S., & Basbaum, A. I. (1997). Preserved acute pain  
916 and reduced neuropathic pain in mice lacking PKCgamma. *Science*, 278(5336), 279-  
917 283. doi:10.1126/science.278.5336.279
- 918 Maxwell, D. J. (1985). Combined light and electron microscopy of Golgi-labelled neurons in  
919 lamina III of the feline spinal cord. *J Anat*, 141, 155-169.
- 920 McCoy, E. S., Taylor-Blake, B., & Zylka, M. J. (2012). CGRPalpha-expressing sensory  
921 neurons respond to stimuli that evoke sensations of pain and itch. *PLoS One*, 7(5).  
922 doi:10.1371/journal.pone.0036355
- 923 Neumann, S., Braz, J. M., Skinner, K., Llewellyn-Smith, I. J., & Basbaum, A. I. (2008).  
924 Innocuous, not noxious, input activates PKCgamma interneurons of the spinal dorsal  
925 horn via myelinated afferent fibers. *J Neurosci*, 28(32), 7936-7944.  
926 doi:10.1523/JNEUROSCI.1259-08.2008
- 927 Oliveira, A. L., Hydling, F., Olsson, E., Shi, T., Edwards, R. H., Fujiyama, F., . . . Meister, B.  
928 (2003). Cellular localization of three vesicular glutamate transporter mRNAs and  
929 proteins in rat spinal cord and dorsal root ganglia. *Synapse*, 50(2), 117-129.  
930 doi:10.1002/syn.10249
- 931 Patil, M. J., Hovhannisyan, A. H., & Akopian, A. N. (2018). Characteristics of sensory  
932 neuronal groups in CGRP-cre-ER reporter mice: Comparison to Nav1.8-cre, TRPV1-

- 933 cre and TRPV1-GFP mouse lines. *PLoS One*, 13(6), e0198601.  
934 doi:10.1371/journal.pone.0198601
- 935 Peirs, C., Williams, S. P., Zhao, X., Walsh, C. E., Gedeon, J. Y., Cagle, N. E., . . . Seal, R. P.  
936 (2015). Dorsal horn circuits for persistent mechanical pain. *Neuron*, 87(4), 797-812.  
937 doi:10.1016/j.neuron.2015.07.029
- 938 Petitjean, H., Bourojeni, F. B., Tsao, D., Davidova, A., Sotocinal, S. G., Mogil, J. S., . . .  
939 Sharif-Naeini, R. (2019). Recruitment of spinoparabrachial neurons by dorsal horn  
940 calretinin neurons. *Cell Rep*, 28(6), 1429-1438. doi:10.1016/j.celrep.2019.07.048
- 941 Petitjean, H., Pawlowski, S. A., Fraine, S. L., Sharif, B., Hamad, D., Fatima, T., . . . Sharif-  
942 Naeini, R. (2015). Dorsal horn parvalbumin neurons are gate-keepers of touch-  
943 evoked pain after nerve injury. *Cell Rep*, 13(6), 1246-1257.  
944 doi:10.1016/j.celrep.2015.09.080
- 945 Punnakkal, P., von Schoultz, C., Haenraets, K., Wildner, H., & Zeilhofer, H. U. (2014).  
946 Morphological, biophysical and synaptic properties of glutamatergic neurons of the  
947 mouse spinal dorsal horn. *J Physiol*, 592(4), 759-776.  
948 doi:10.1113/jphysiol.2013.264937
- 949 Ryu, P. D., Gerber, G., Murase, K., & Randic, M. (1988). Calcitonin gene-related peptide  
950 enhances calcium current of rat dorsal root ganglion neurons and spinal excitatory  
951 synaptic transmission. *Neurosci Lett*, 89(3), 305-312. doi:10.1016/0304-  
952 3940(88)90544-7
- 953 Sathyamurthy, A., Johnson, K. R., Matson, K. J. E., Dobrott, C. I., Li, L., Ryba, A. R., . . .  
954 Levine, A. J. (2018). Massively parallel single nucleus transcriptional profiling defines  
955 spinal cord neurons and their activity during behavior. *Cell Rep*, 22(8), 2216-2225.  
956 doi:10.1016/j.celrep.2018.02.003
- 957 Sherman, S. E., & Loomis, C. W. (1996). Strychnine-sensitive modulation is selective for  
958 non-noxious somatosensory input in the spinal cord of the rat. *Pain*, 66(2-3), 321-330.  
959 doi:10.1016/0304-3959(96)03063-1



- 960 Shields, S. D., Eckert, W. A., 3rd, & Basbaum, A. I. (2003). Spared nerve injury model of  
961 neuropathic pain in the mouse: a behavioral and anatomic analysis. *J Pain*, 4(8), 465-  
962 470. doi:10.1067/s1526-5900(03)00781-8
- 963 Smith, K. M., Browne, T. J., Davis, O. C., Coyle, A., Boyle, K. A., Watanabe, M., . . . Graham,  
964 B. A. (2019). Calretinin positive neurons form an excitatory amplifier network in the  
965 spinal cord dorsal horn. *Elife*, 8. doi:10.7554/eLife.49190
- 966 Solorzano, C., Villafuerte, D., Meda, K., Cevikbas, F., Braz, J., Sharif-Naeini, R., . . .  
967 Basbaum, A. I. (2015). Primary afferent and spinal cord expression of gastrin-  
968 releasing peptide: message, protein, and antibody concerns. *J Neurosci*, 35(2), 648-  
969 657. doi:10.1523/JNEUROSCI.2955-14.2015
- 970 Song, H., Yao, E., Lin, C., Gacayan, R., Chen, M. H., & Chuang, P. T. (2012). Functional  
971 characterization of pulmonary neuroendocrine cells in lung development, injury, and  
972 tumorigenesis. *Proc Natl Acad Sci U S A*, 109(43), 17531-17536.  
973 doi:10.1073/pnas.1207238109
- 974 Sun, Y. G., & Chen, Z. F. (2007). A gastrin-releasing peptide receptor mediates the itch  
975 sensation in the spinal cord. *Nature*, 448(7154), 700-703. Retrieved from  
976 <https://www.ncbi.nlm.nih.gov/pubmed/17653196>. doi:10.1038/nature06029
- 977 Tie-Jun, S. S., Xu, Z., & Hokfelt, T. (2001). The expression of calcitonin gene-related peptide  
978 in dorsal horn neurons of the mouse lumbar spinal cord. *Neuroreport*, 12(4), 739-743.  
979 doi:10.1097/00001756-200103260-00025
- 980 Torsney, C., & MacDermott, A. B. (2006). Disinhibition opens the gate to pathological pain  
981 signaling in superficial neurokinin 1 receptor-expressing neurons in rat spinal cord. *J*  
982 *Neurosci*, 26(6), 1833-1843. doi:10.1523/JNEUROSCI.4584-05.2006
- 983 Wercberger, R., & Basbaum, A.I. (2019). Spinal cord projection neurons: a superficial, and  
984 also deep analysis. *Curr Opin Physiol*, 11, 109-115.  
985 doi:10.1016/j.cophys.2019.10.002

986 Woolf, C., & Wiesenfeld-Hallin, Z. (1986). Substance P and calcitonin gene-related peptide  
987 synergistically modulate the gain of the nociceptive flexor withdrawal reflex in the rat.  
988 *Neurosci Lett*, 66(2), 226-230. doi:10.1016/0304-3940(86)90195-3

989 Yasaka, T., Tiong, S. Y., Hughes, D. I., Riddell, J. S., & Todd, A. J. (2010). Populations of  
990 inhibitory and excitatory interneurons in lamina II of the adult rat spinal dorsal horn  
991 revealed by a combined electrophysiological and anatomical approach. *Pain*, 151(2),  
992 475-488. doi:10.1016/j.pain.2010.08.008

993 Yasui, Y., Saper, C. B., & Cechetto, D. F. (1991). Calcitonin gene-related peptide (CGRP)  
994 immunoreactive projections from the thalamus to the striatum and amygdala in the  
995 rat. *J Comp Neurol*, 308(2), 293-310. doi:10.1002/cne.903080212

996 Yoshida, A., Dostrovsky, J. O., Sessle, B. J., & Chiang, C. Y. (1991). Trigeminal projections  
997 to the nucleus submedius of the thalamus in the rat. *J Comp Neurol*, 307(4), 609-625.  
998 doi:10.1002/cne.903070408

999  
1000  
1001  
1002  
1003  
1004  
1005  
1006  
1007  
1008  
1009  
1010  
1011  
1012  
1013

1014 **SUPPLEMENTARY FIGURES**

1015

1016 **Supplementary Figure 1. CGRP-tdTomato expression in the lumbar spinal cord.**

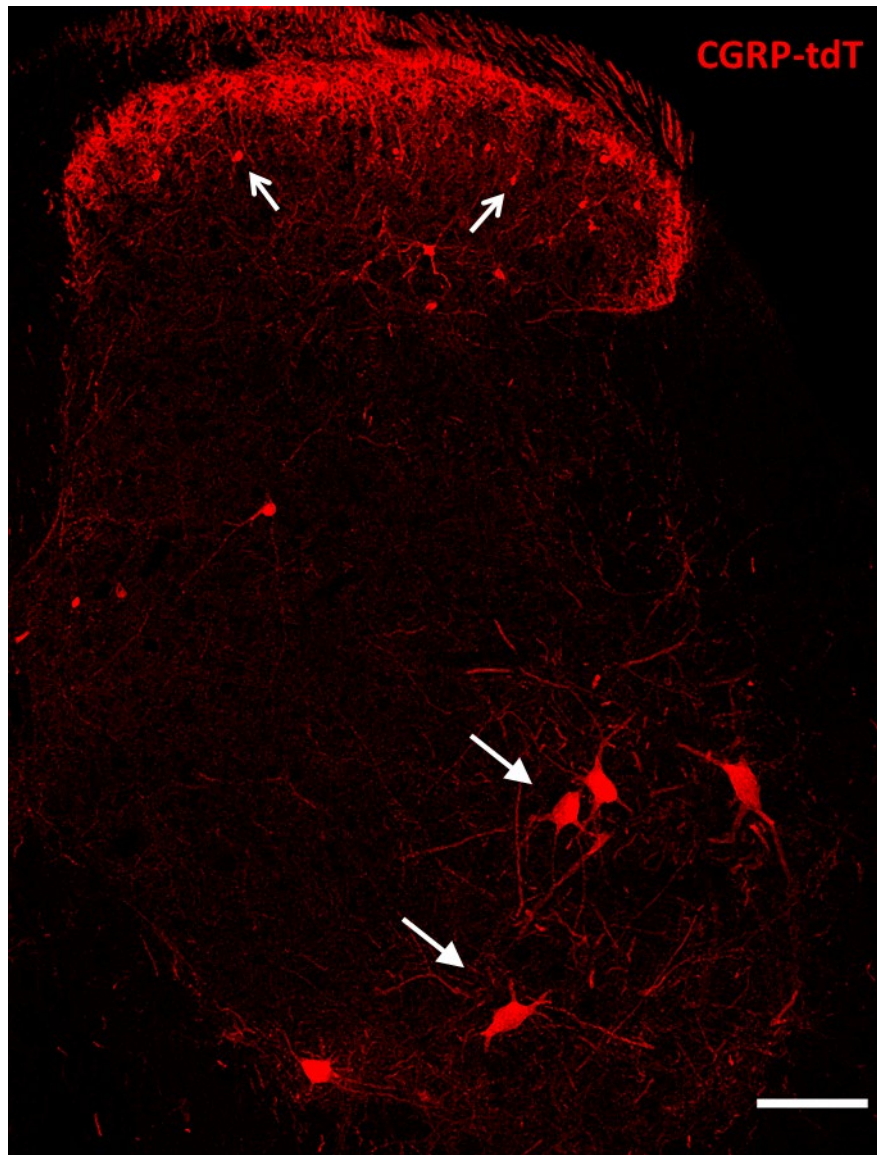

1017

1018 **Supplementary Figure 1.** Lumbar section from a CGRP-tdTomato mouse. Arrows  
1019 point to intensely fluorescent CGRP-tdTomato neurons in lamina III of the dorsal horn  
1020 and ventral horn motoneurons. Laminae I and II (substantia gelatinosa) contain a  
1021 dense array of fluorescent processes originating from CGRP-expressing primary  
1022 sensory neurons. Scale bars: 100  $\mu$ m.

1023 **Supplementary Figure 2. CGRP-tdTomato expression in the parabrachial**  
1024 **nucleus.**

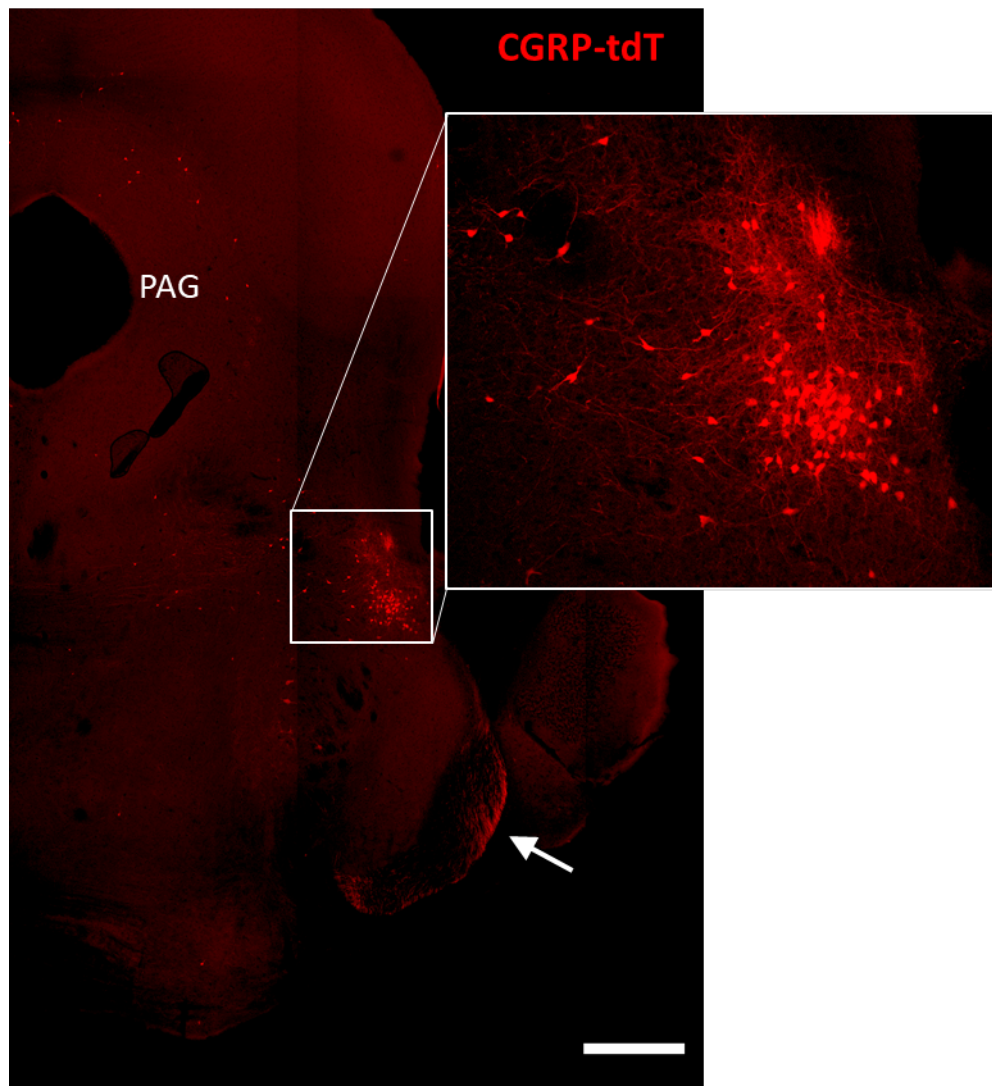

1025  
1026 **Supplementary Figure 2.** CGRP-tdTomato fluorescence at a caudal midbrain/rostral  
1027 pontine level. The boxed area in the main figure shows intensely labelled neurons in  
1028 the external lateral parabrachial nucleus, which are shown at higher magnification in  
1029 the inset. The periaqueductal gray (PAG) also contains scattered CGRP-tdTomato-  
1030 expressing neurons. The arrow points to primary afferent axons originating from the  
1031 trigeminal ganglion. Scale bar: 500  $\mu$ m.

1032

1033 **Supplementary Figure 3. CGRP-tdTomato expression in the amygdala.**

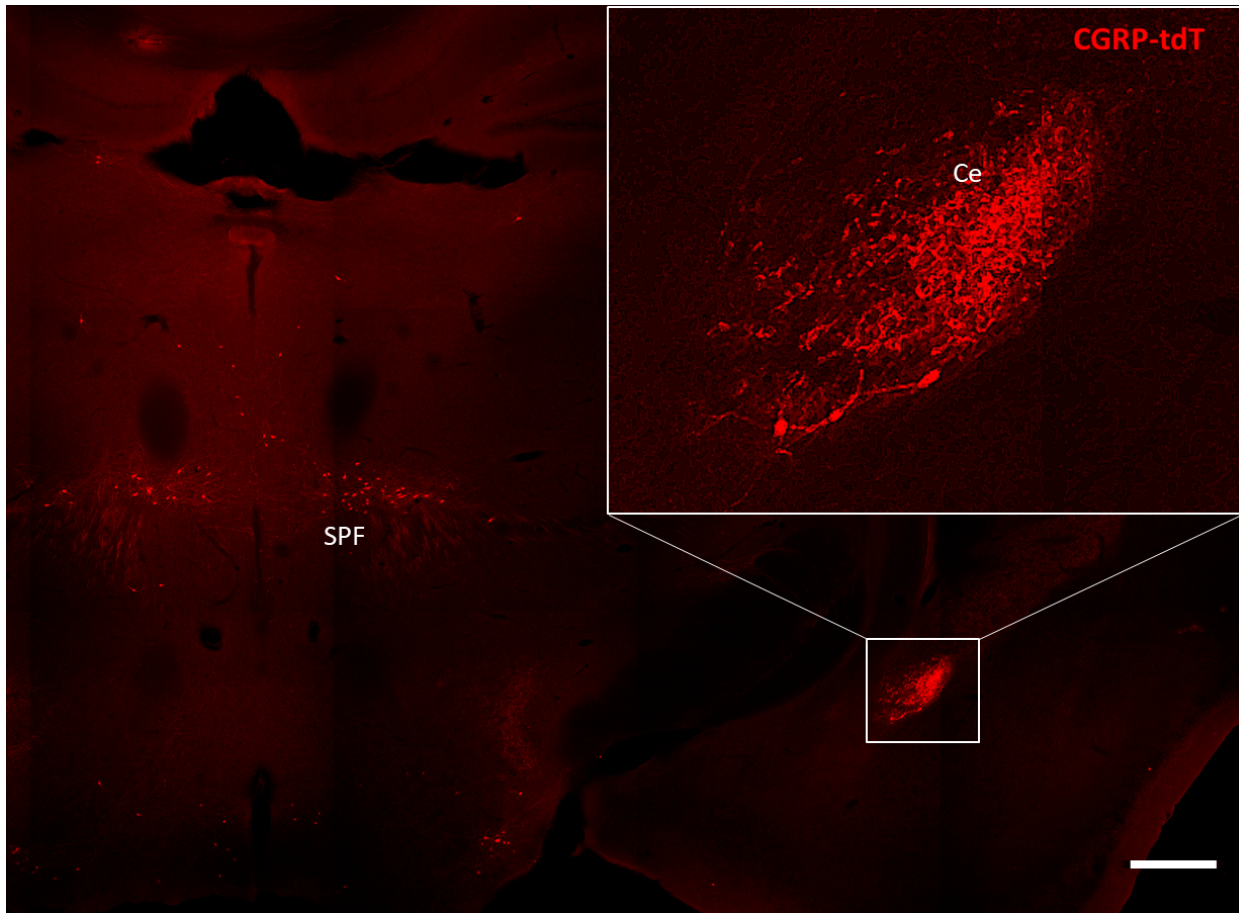

1034

1035

1036 **Supplementary Figure 3.** CGRP-tdTomato fluorescence at a thalamic level. The  
1037 boxed area in the main figure shows the dense plexus of CGRP-tdTomato  
1038 fluorescent processes in the central nucleus of the amygdala (Ce). The section also  
1039 illustrates labelled neurons in the subparafascicular nucleus of the thalamus (SPF).

1040 Scale bar: 500  $\mu$ m.

1041

1042

1043

1044

1045



1046 **Supplementary Figure 4. CGRP-tdTomato expression in the trigeminal nucleus**  
1047 **caudalis**

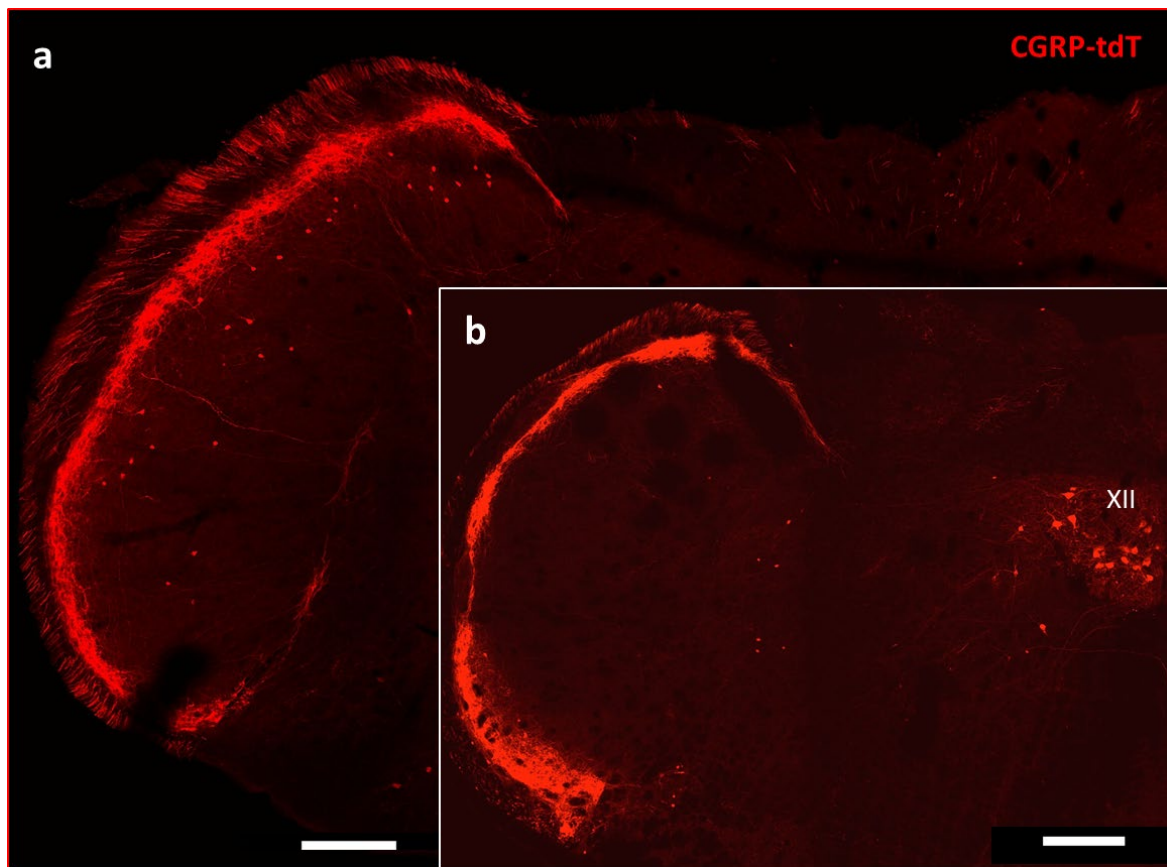

1048  
1049 **Supplementary Figure 4.** Caudal levels of the medulla (a) contain greater numbers  
1050 of CGRP-tdTomato neurons in lamina III of the nucleus caudalis compared to more  
1051 rostral levels (b). The latter level includes CGRP-tdTomato-expressing motoneurons  
1052 in the hypoglossal nucleus (XII), Scale bars: 500  $\mu\text{m}$ .

1053

1054

1055

1056

1057

1058

1059 **Supplementary Figure 5. CGRP tdTomato interneurons are Pax2-negative.**

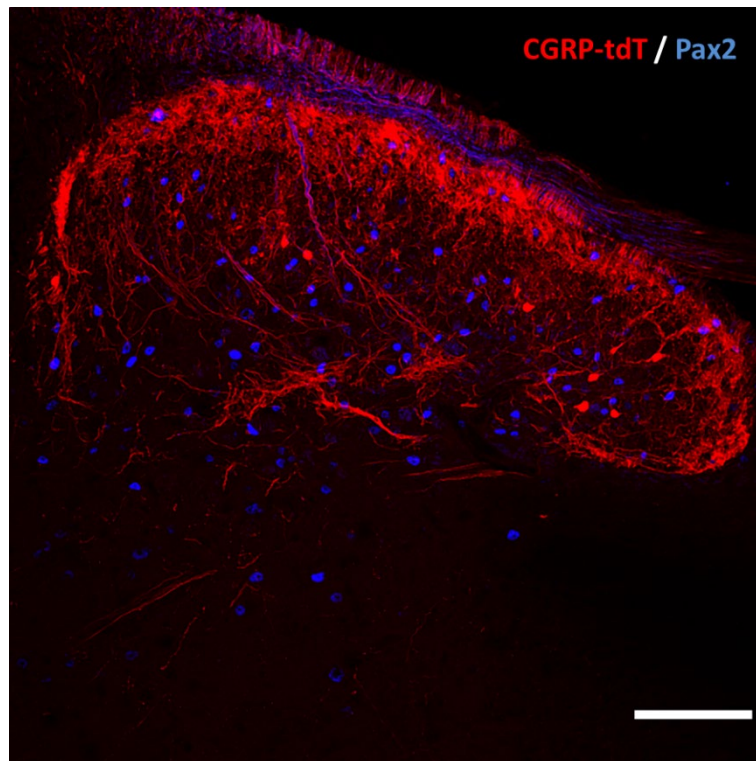

1060

1061 **Supplementary Figure 5.** In lumbar dorsal horn, the absence of double labelling for  
1062 CGRP-tdTomato (red) and Pax2 (blue)-immunoreactivity, a marker of inhibitory  
1063 interneurons, indicates that the dorsal horn CGRP-tdTomato neurons are excitatory.

1064 Scale bar: 100  $\mu$ m.

1065

1066

1067

1068

1069

1070

1071

1072

1073



1074 **Supplementary Figure 6: Dorsal horn CGRP interneurons have ventrally-**  
1075 **directed axons.**

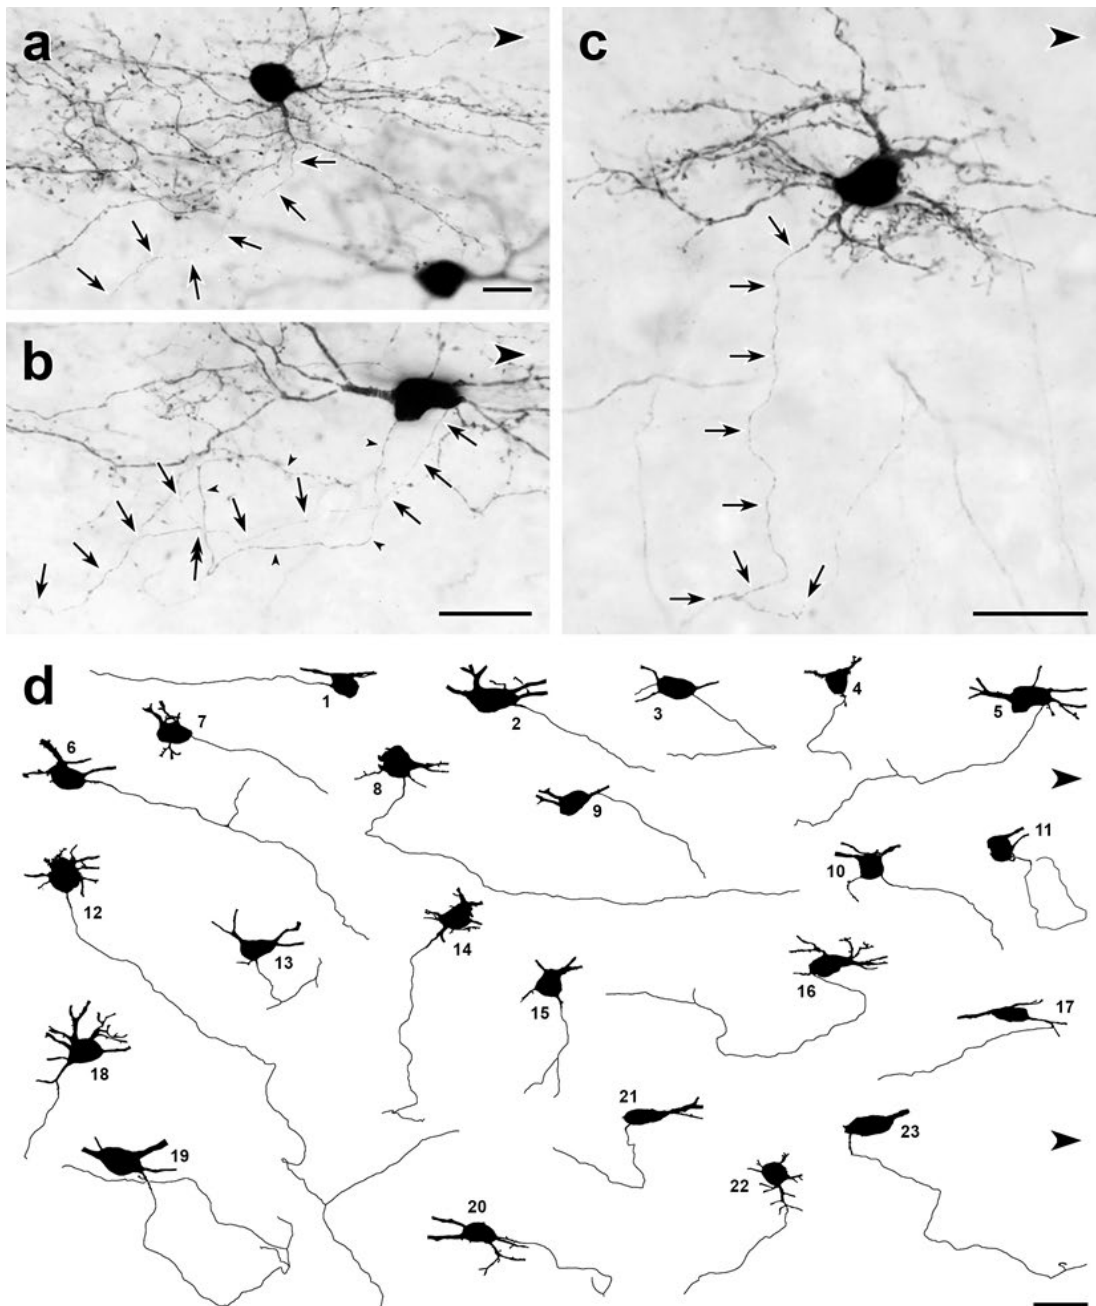

1076

1077 **Supplementary Figure 6: (a-c)** Parasagittal 50  $\mu\text{m}$ -thick sections of lumbar  
1078 enlargement from CGRP-CreER-tdT mice that received intrathecal capsaicin  
1079 treatment to reduce tdTomato-immunoreactivity from primary afferents. In most  
1080 cases, the axons (arrows) of the dorsal horn CGRP-tdTomato interneurons travel

1081 ventrally. **a**, an axon arises from a ventrally-projecting primary dendrite, rather than  
1082 the cell body. **b**, The axon (arrows) of this tdT-positive neuron arises from the caudal  
1083 ventral surface of the cell body and travels ventrally and rostrally. The cell body also  
1084 emits a very fine dendritic process, defined by the presence of spines (double-  
1085 headed arrow). **c**) This heavily spine-laden, multipolar CGRP-tdTomato interneuron  
1086 emits a ventrally directed axon from one of its dendrites. **d**, Drawings of 23 dorsal  
1087 horn CGRP-tdTomato interneurons whose axons could be identified and traced.  
1088 Each drawing shows the neuronal cell body and its axon as well as initial portions of  
1089 its major primary dendrites. Nineteen of the axons originate from the ventral region of  
1090 the cell body; 3 (**d14**, **d18**, **d22**), from a ventrally-projecting primary dendrite and one  
1091 (**d17**) from a secondary dendrite close to its branch point off a primary dendrite. Most  
1092 of the axons travel ventrally and caudally; some travel rostrally (e.g., **d1**, **d5**) and an  
1093 occasional axon courses directly ventral (e.g., **d15**). After initially travelling ventro-  
1094 caudally, 2 of the axons (**d11**, **d19**) looped dorsally and then began to travel rostrally.  
1095 Eight of the axons bifurcated (**d5**, **d6**, **d12**, **d13**, **d14**, **d15**, **d16**, **d19**), all within 120  
1096  $\mu\text{m}$  of their origin from a cell body. Scale bars: 20  $\mu\text{m}$ .

1097

1098

1099

1100

1101

1102

1103

1104

1105

1106

1107 **Supplementary Figure 7. Radial morphology of the CGRP-tdTomato**  
1108 **interneurons revealed after AAV injection.**

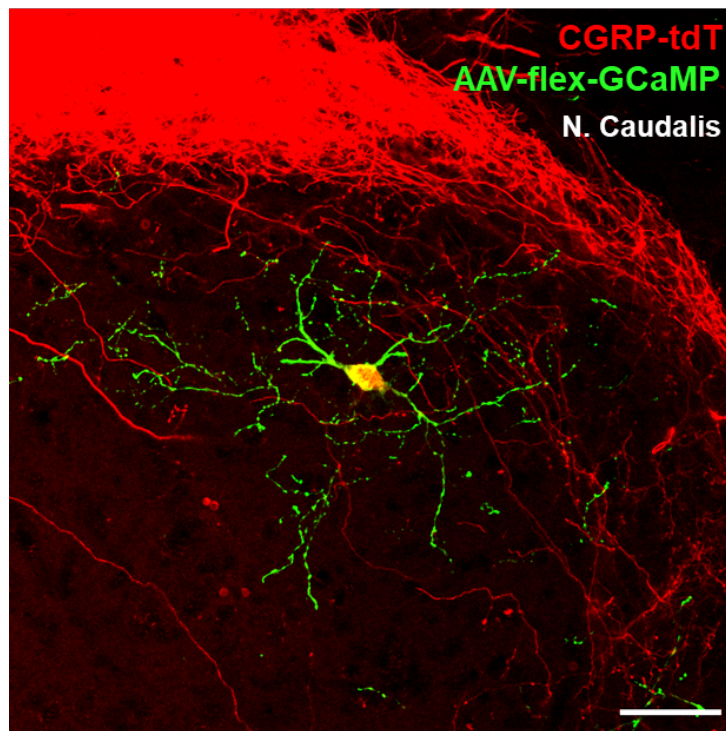

1109  
1110 **Supplementary Figure 7.** A CGRP-tdTomato neuron after injection of Cre-  
1111 dependent AAV1-GCaMP6 (green) into the nucleus caudalis. This approach revealed  
1112 a comparable morphology of the CGRP-tdTomato interneuron to that illustrated in  
1113 Figure 4 and Supplementary Figures 6 a-c, but did not reveal distant axonal  
1114 projections. Scale bar: 50  $\mu$ m.

1115  
1116  
1117  
1118  
1119  
1120  
1121  
1122

1123 **Supplementary Figure 8. Neither noxious nor innocuous stimuli induce Fos**  
1124 **expression in CGRP-tdTomato interneurons in control mice.**

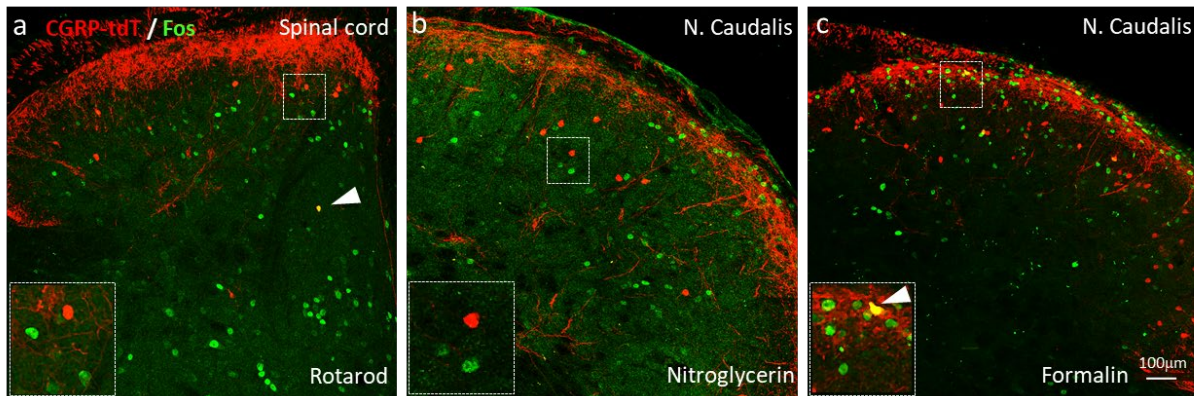

1125  
1126 **Supplementary Figure 8. a**, Fos expression-immunoreactivity (green) in neurons of  
1127 the lumbar dorsal horn after walking on a rotarod (90 mins). **b**. Fos-immunoreactivity  
1128 in the neurons of the nucleus caudalis after systemic nitroglycerin injection (10  
1129 mg/kg, i.p.) or after a 2% formalin (10  $\mu$ l) injection into the cheek (**c**) in  
1130 unanesthetized mice. Insets illustrate higher magnification images of separate  
1131 populations of Fos-immunoreactive and CGRP-tdTomato interneurons. Arrows in **a**  
1132 and **c** point to rare double-labelled cells outside lamina III. Scale bar: 100  $\mu$ m.

1133

1134

1135

1136

1137

1138

1139

1140

1141

1142

1143 **Supplementary Figure 9. Capsaicin does not activate CGRP-tdTomato**  
1144 **interneurons in the lumbar spinal cord or trigeminal nucleus caudalis.**

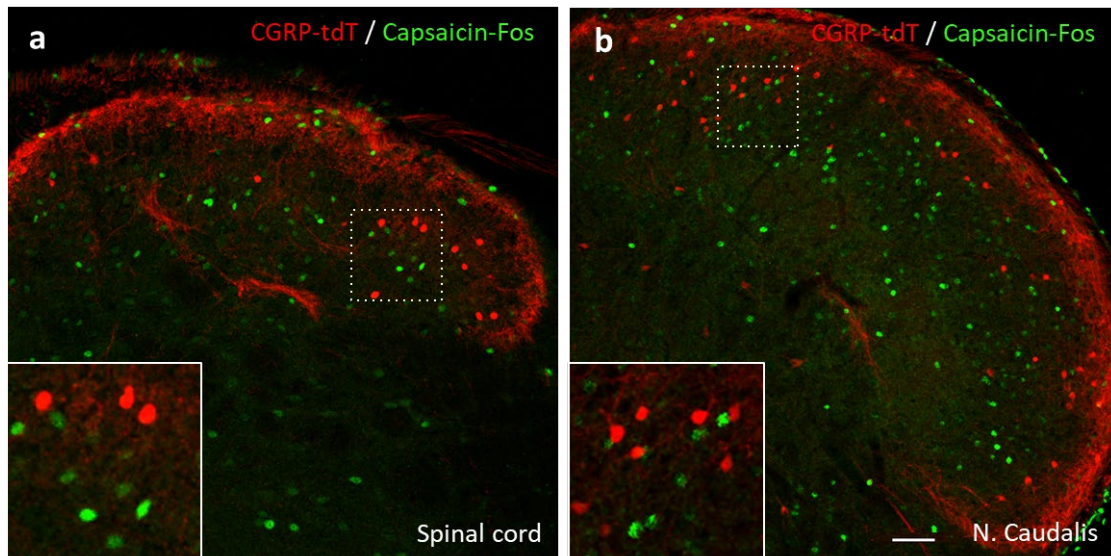

1145  
1146 **Supplementary Figure 9.** In anesthetized mice (2% isoflurane), a unilateral injection  
1147 of 20  $\mu$ l of capsaicin (1.0  $\mu$ g/ $\mu$ l) into the hindpaw (a) or the cheek (b) did not induce  
1148 Fos expression (green) in CGRP-tdTomato interneurons in the dorsal horn of the  
1149 lumbar spinal cord (a) or in the nucleus caudalis (b). Insets show higher  
1150 magnification views of boxed areas. Scale bar: 50  $\mu$ m.

1151

1152

1153

1154

1155

1156

1157

1158

1159

1160



1161 **Supplementary Figure 10. GRP, CGRP and pruritogen-evoked Fos expression**

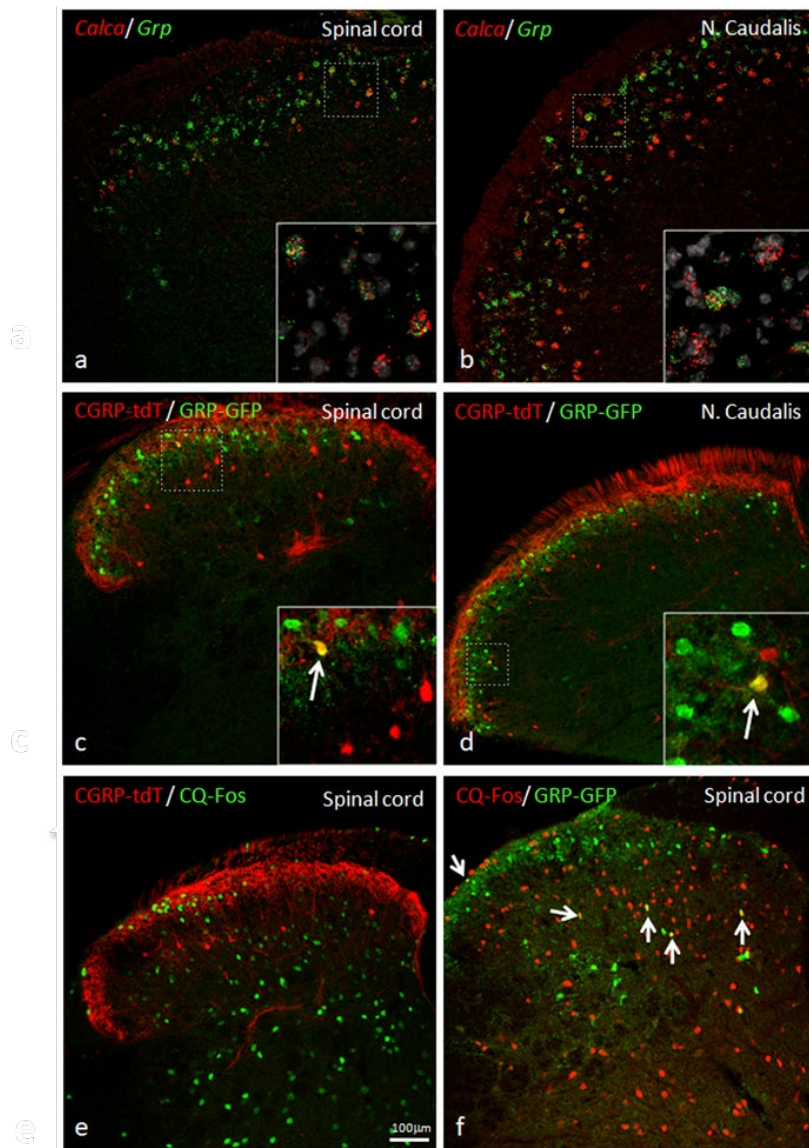

1162

1163 **Supplementary Figure 10. GRP, CGRP and pruritogen-evoked Fos expression**

1164 Double *in situ* hybridization for tdTomato (red) and GRP (green) illustrates  
1165 considerable mRNA co-expression in neurons of the dorsal horn (a) and nucleus  
1166 caudalis (b) of CGRP-tdTomato mice. In contrast, immunocytochemical localization  
1167 of GRP and tdTomato in a tamoxifen-treated tdTomato-CGRP-CreER mouse that  
1168 was crossed with a GRP-GFP reporter mouse revealed only occasional double  
1169 labeling (arrow in inset) in the dorsal horn (c) or nucleus caudalis (d). Consistent with

1170 this minimal overlap, Fos expression in tdTomato-labeled CGRP interneurons was  
 1171 rare in response to a hindpaw injection of chloroquine (CQ; **e**). In contrast, many  
 1172 GRP-GFP interneurons were immunostained for Fos in response to CQ (arrows in **f**).  
 1173 As the mice were anesthetized the CQ-induced Fos was scratching-independent.  
 1174 Scale bar: 100  $\mu$ m.

1175

1176 **Supplementary Table 1. Electrophysiological properties of CGRP-tdTomato**  
 1177 **interneurons in the dorsal horn and nucleus caudalis**

**Table 1. Intrinsic properties of CGRP-tdTomato neurons**

\*mean +/- SD

| <b>Membrane properties</b> | Spinal cord      | Caudalis        |
|----------------------------|------------------|-----------------|
|                            | 22 cells, 8 mice | 5 cells, 2 mice |
| Vm (mV)                    | -78.9 +/- 7.7    | -76 +/- 2.8     |
| Rheobase (pA)              | 62.7 +/- 40.8    | 50.52 +/- 26.13 |
| AP thresh.                 | -41.3 +/- 15.2   | -48.15 +/- 9.44 |
| Cm (pF)                    | 40.3 +/- 14.7    | 44.55 +/- 12.63 |
| Rm (mOhm)                  | 603.1 +/- 296.8  | 710 +/- 463     |

| <b>Firing pattern</b> |       |     |
|-----------------------|-------|-----|
| Delayed               | 17/22 | 2/5 |
| Tonic                 | 1/22  | 0   |
| Reluctant             | 1/22  | 1/5 |
| Single                | 0     | 2/5 |
| No response           | 3     | 0   |

| <b>Afferent input</b> | 5 cells, 3 mice | n/a |
|-----------------------|-----------------|-----|
| A-mono                | 5/5             | n/a |
| C-poly & mono         | 2/5             | n/a |

1178

1179 **Supplementary Table 1.** Most CGRP-tdTomato neurons showed delayed firing  
 1180 patterns (delayed 19, tonic 1, reluctant 2, single 2, no response 3). Based on  
 1181 electrical stimulation of dorsal roots, we conclude that CGRP interneurons in the  
 1182 lumbar cord predominantly receive monosynaptic input from A $\beta$  primary afferent  
 1183 fibers.

1184
